# Supplementary material for: Spectroscopic and theoretical insights into hydrogen bonding clusters, triplet species, and the relaxation mechanism of the light (1ππ*) excited state of 4-methyl-1,2,4-triazole-3-thione
Source: Royal Society of Chemistry journal article supplement (doi:10.1039/d2nj03262g), 2022-01-01
Supplement: d2nj03262g1.pdf [file d2nj03262g1.pdf]

## Supporting Information

### Spectroscopic and Theoretical Studies on Hydrogen Bonding Clusters, Triplet Species and Relaxation Mechanism of Light ( $^1\pi\pi^*$ ) State of 4-Methyl-1, 2, 4-Triazole-3-Thione

Yu Li<sup>1</sup>, Bo-Long Liu<sup>+</sup>, Suosuo An<sup>1</sup>, Yanying Zhao<sup>1\*</sup>, Jiadan Xue<sup>1</sup>, Xuming Zheng<sup>1</sup>,  
Bin-Bin Xie<sup>+\*</sup>,

---

<sup>1</sup>*Department of Chemistry and Key Laboratory of Surface & Interface Science of Polymer Materials of Zhejiang Province, Zhejiang Sci-Tech University, Hangzhou 310018, China*

<sup>+</sup>*Hangzhou Institute of Advanced Studies, Zhejiang Normal University, 1108 Gengwen Road, Hangzhou 311231, Zhejiang, P. R. China*

---

\* Corresponding author: [yyzhao@zstu.edu.cn](mailto:yyzhao@zstu.edu.cn) (Y. Zhao); [binbinxie@zjnu.edu.cn](mailto:binbinxie@zjnu.edu.cn) (B. Xie)

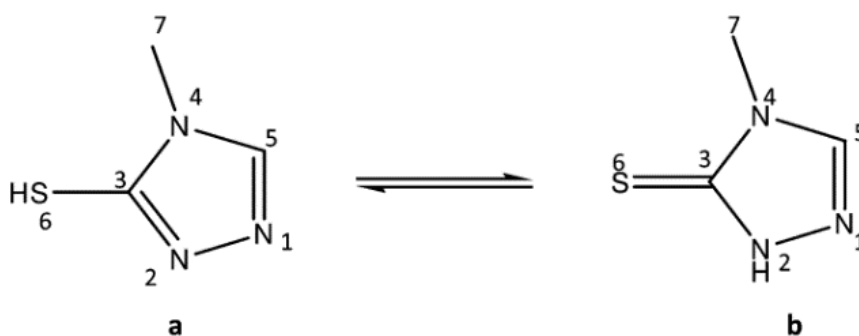

**Scheme S1.** 4-MTT in (a) thiol and (b) thione forms.

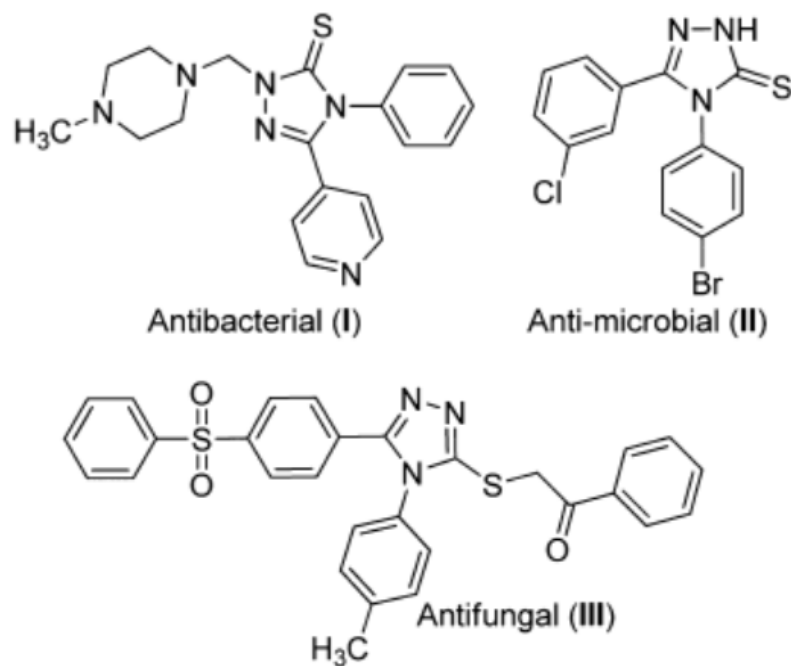

**Scheme S2.** Some biologically active 1,2,4-triazole-3-thione derivatives.

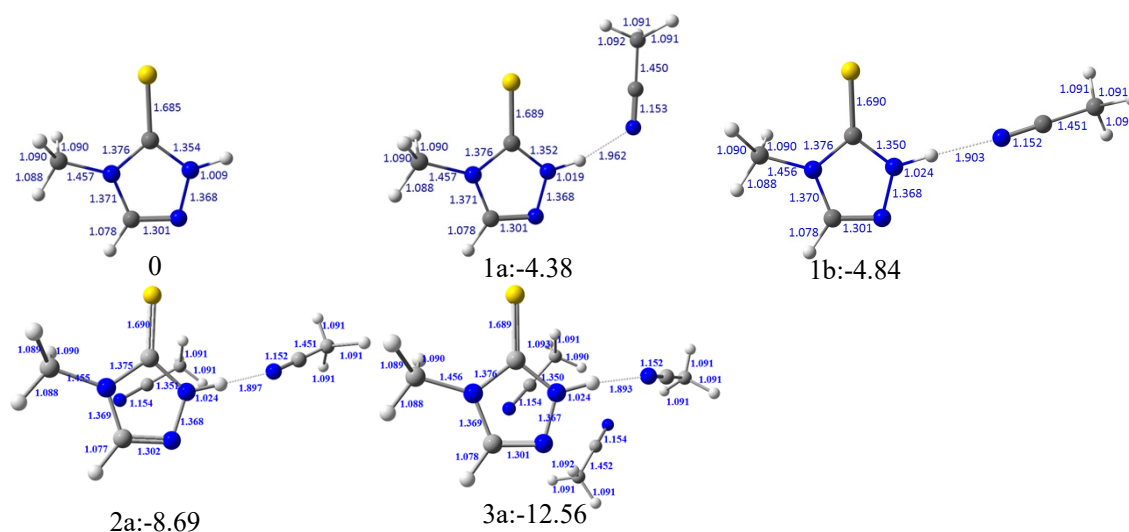

**Figure S1.** Optimized bond lengths (in Å) and relative energies ( $\Delta E$ , in kcal/mol) of 4MTT and 4MTT(CH<sub>3</sub>CN)<sub>n</sub> (n=1~3) clusters at B3LYP-D3(BJ)/6-311++G(d, p) level with PCM solvent model.

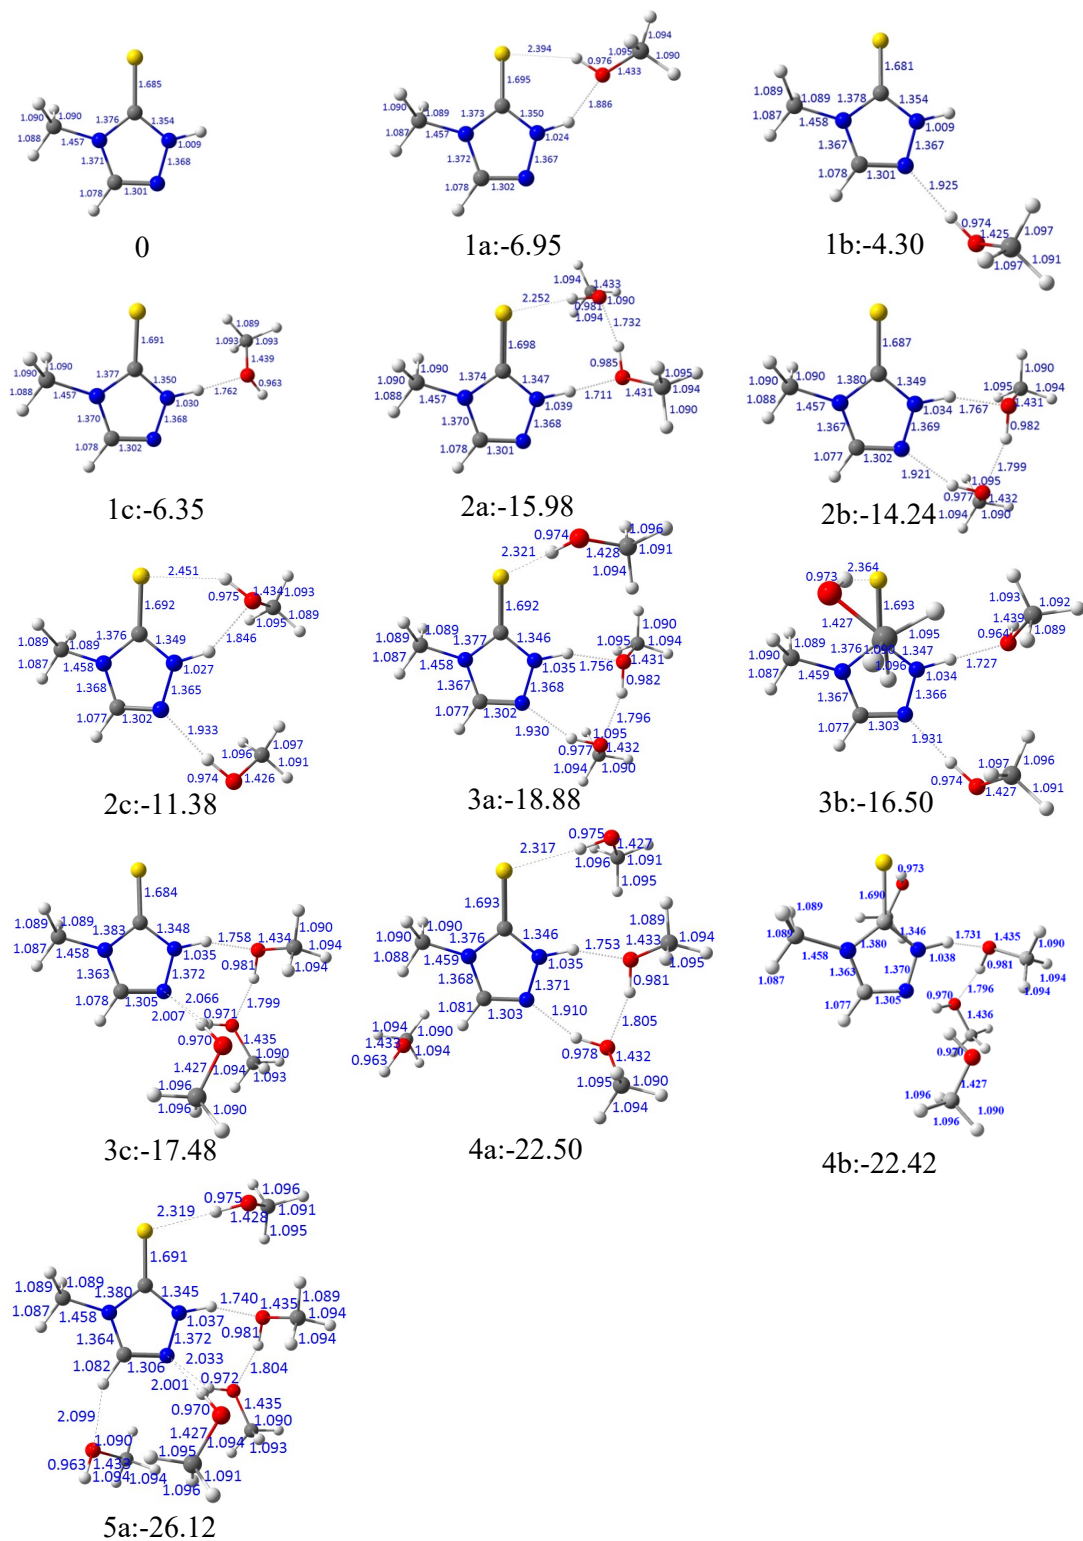

**Figure S2.** Optimized bond lengths (in Å) and relative energies ( $\Delta E$ , in kcal/mol) of 4MTT and 4MTT(CH<sub>3</sub>OH)<sub>n</sub> (n=1~5) clusters at B3LYP-D3(BJ)/6-311++G(d,p) level with PCM solvent model.

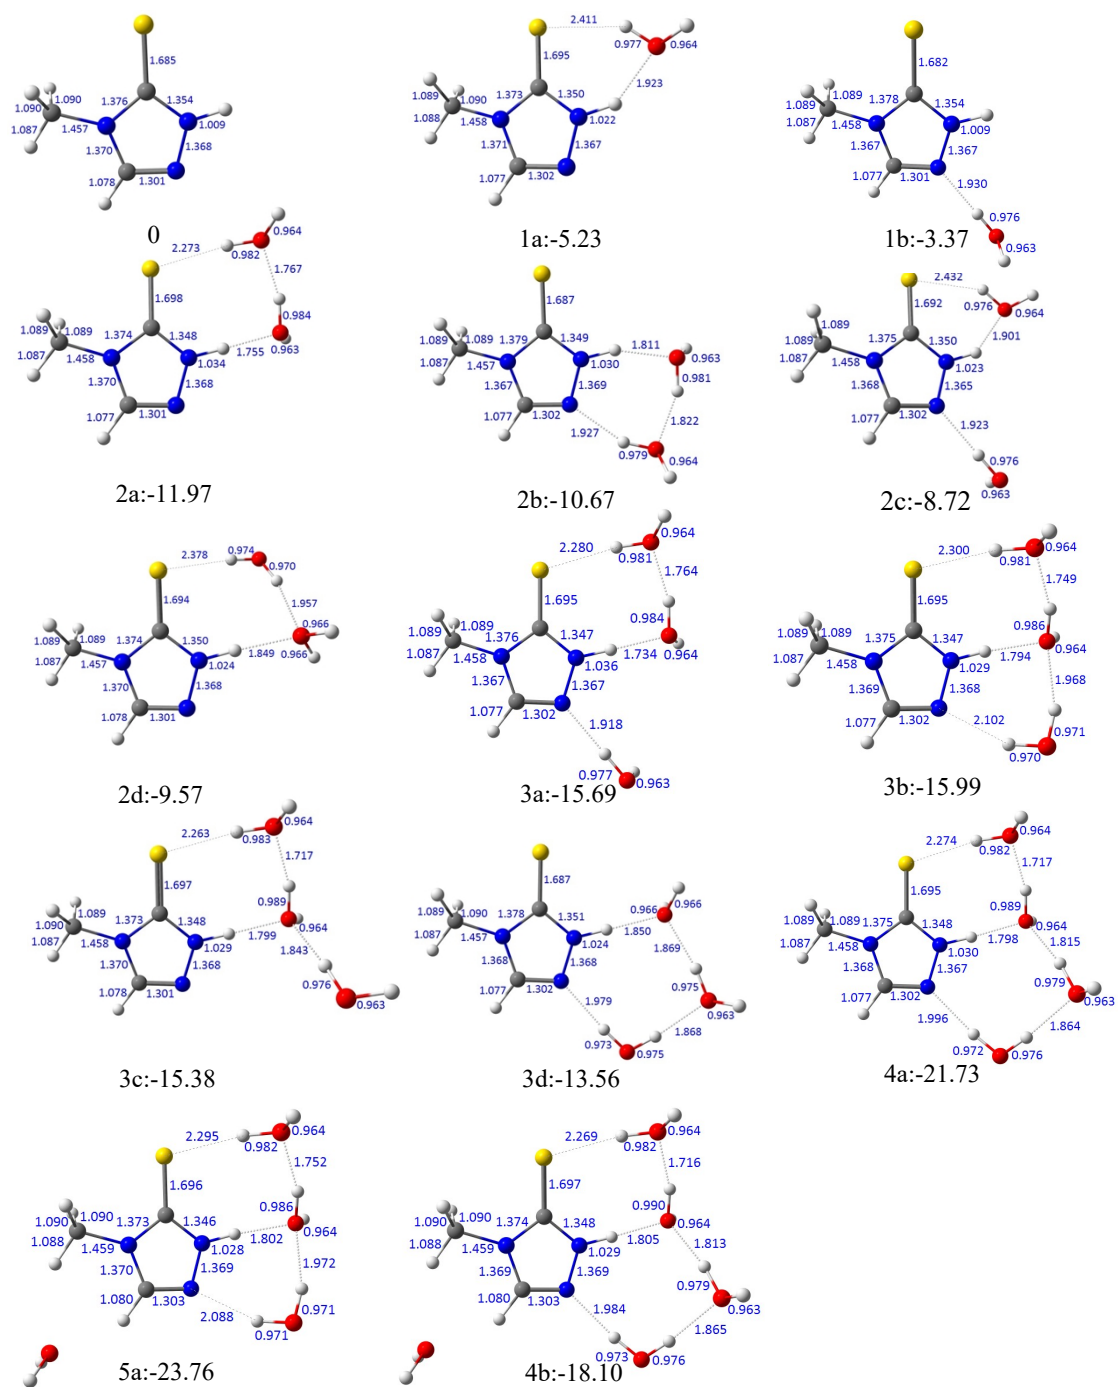

**Figure S3.** Optimized bond lengths (in Å) and relative energies ( $\Delta E$ , in kcal/mol) of 4MTT and 4MTT(H<sub>2</sub>O)<sub>n</sub> (n=1~5) clusters at B3LYP-D3(BJ)/6-311++G(d, p) level with PCM solvent model.

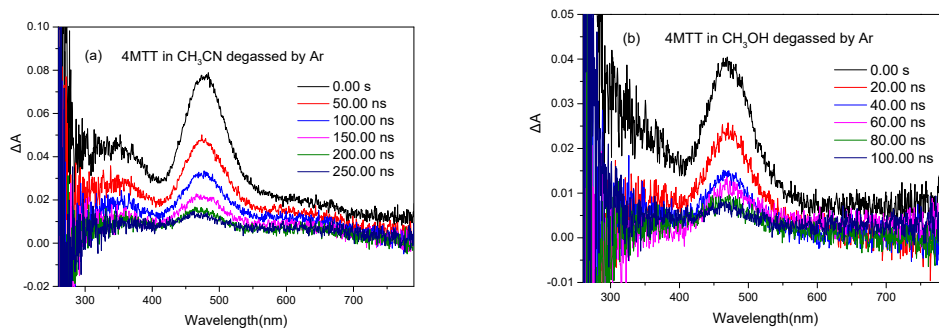

**Figure S4.** Nanosecond transient absorption spectra ( $\lambda_{\text{ex}}=266$  nm) in (a)  $\text{CH}_3\text{CN}$  and (b)  $\text{CH}_3\text{OH}$  in degassed by Ar.

**Figure S5.** Calculated potential decay energy profile of the excited singlet and triplet electronic states from vertical excited  $S_2(\pi\pi^*)$  state at (TD)B3LYP-D3(BJ)/6-311G(d, p) level with PCM Water model. The red dotted line indicated one most possible decay path direct to the triplet state observed experimentally.

The ground planar 4MTT was stimulated to the  $S_2$  state in the Frank-Condon district ( $S_2$ -FC) with  $\sim 120$  kcal/mol<sup>-1</sup> using 266 nm laser, which was corresponding to the first observed band at  $\sim 250$  nm. Two relaxation pathways that connect the  $S_2$ -FC point were shown in Figure 9. One directs to the pyramidal minimum structure  $S_{2min}(\pi\pi^*)$  with  $\sim 95$  kcal/mol, the other along with the relaxation of  $S_1(n\pi^*)$  state with  $\sim 107$  kcal/mol via a very fast internal conversion(IC) point. And then along ( $^1n\pi^*$ ) state to the intersystem crossing points ( $S_1/T_1$ ) was seamlessly reached to the ( $^3\pi\pi^*$ ) state. However, excited state intramolecular proton transfer (ESIPT) from  $S_1/T_1$  point could pass a barrier of  $\sim 16$  kcal/mol<sup>-1</sup> to tautomeric triplet. Furthermore, the photophysical pathways were calculated either direct to  $S_{1min}$  or to normal triplet species via conical intersection point  $S_0/T_1$ . Thus four possible decay pathways were proposed. According to our experiments, one of the most possible relaxation pathways direct to the triplet state species was observed. The mechanism was proposed as  $S_2(\pi\pi^*) \rightarrow S_1(n\pi^*) \rightarrow S_1(n\pi^*)/T_1(\pi\pi^*) \rightarrow S_0/T_1(\pi\pi^*) \rightarrow ^3(\pi\pi^*)_{min}$  or nonradiative to ground state from  $T_1(\pi\pi^*)$  via the  $S_0/T_1(\pi\pi^*)$ .

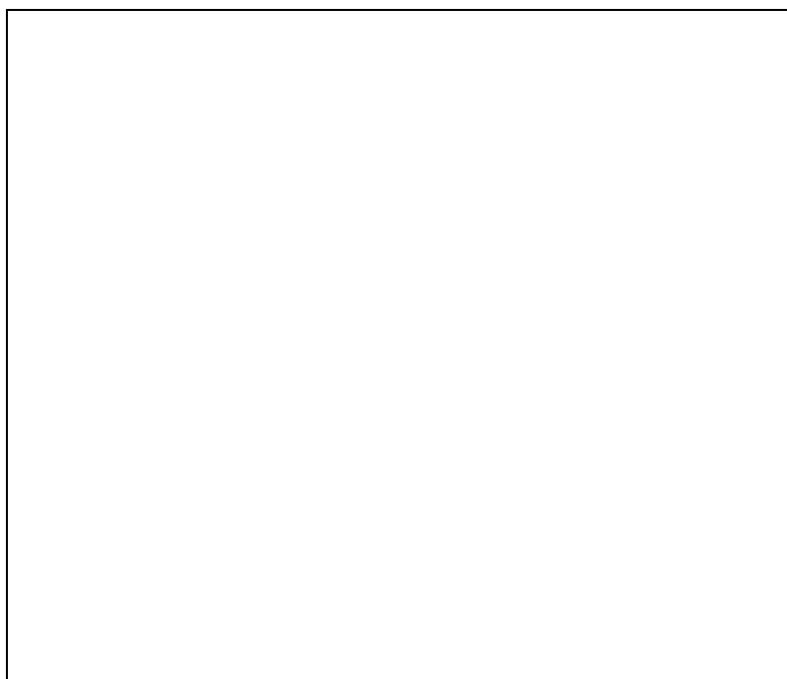

**Figure S6.** Calculated potential decay energy profile of the excited singlet and triplet electronic states from vertical excited  $S_2(\pi\pi^*)$  state at (TD)B3LYP-D3(BJ) /6-311G(d,p) level with PCM acetonitrile model. The red dotted line indicated one most possible decay path direct to the triplet state observed experimentally.

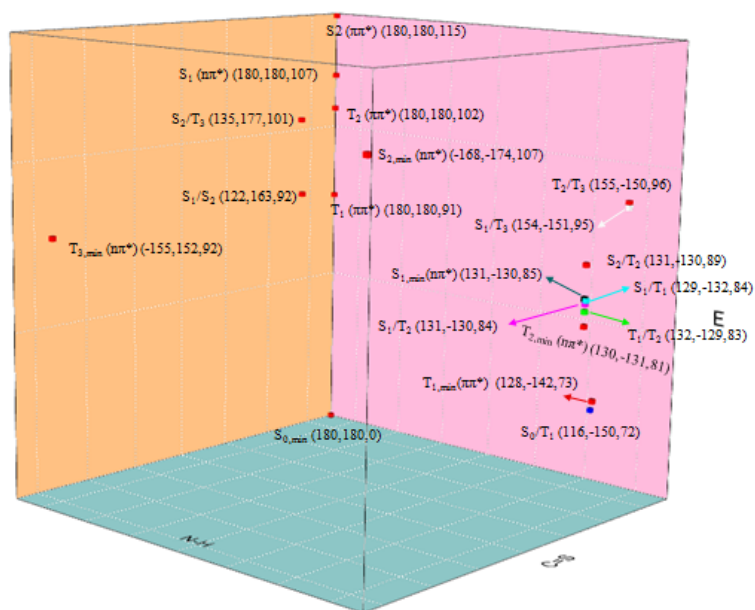

**Figure S7.** The Optimized all the minima at CASSCF(12e,9o)/cc-pVDZ level (the data in parentheses are indicated ( $\Phi_1=D_{N4-C1-C5-S7}$ ,  $\Phi_2=D_{C1-N5-N4-H9}$ , energy relative to

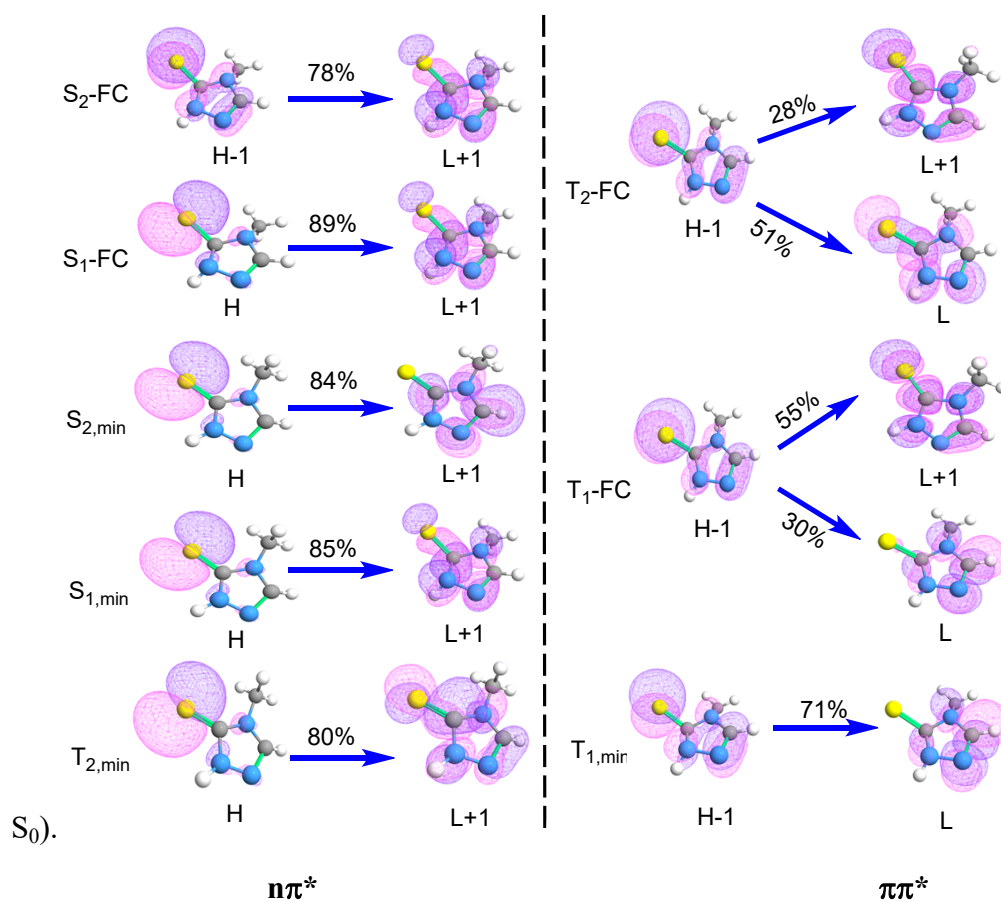

**Figure S8.** Frontier molecular orbitals of 4MTT in excited states calculated at CASSCF(12e,9o)/cc-pVDZ level.

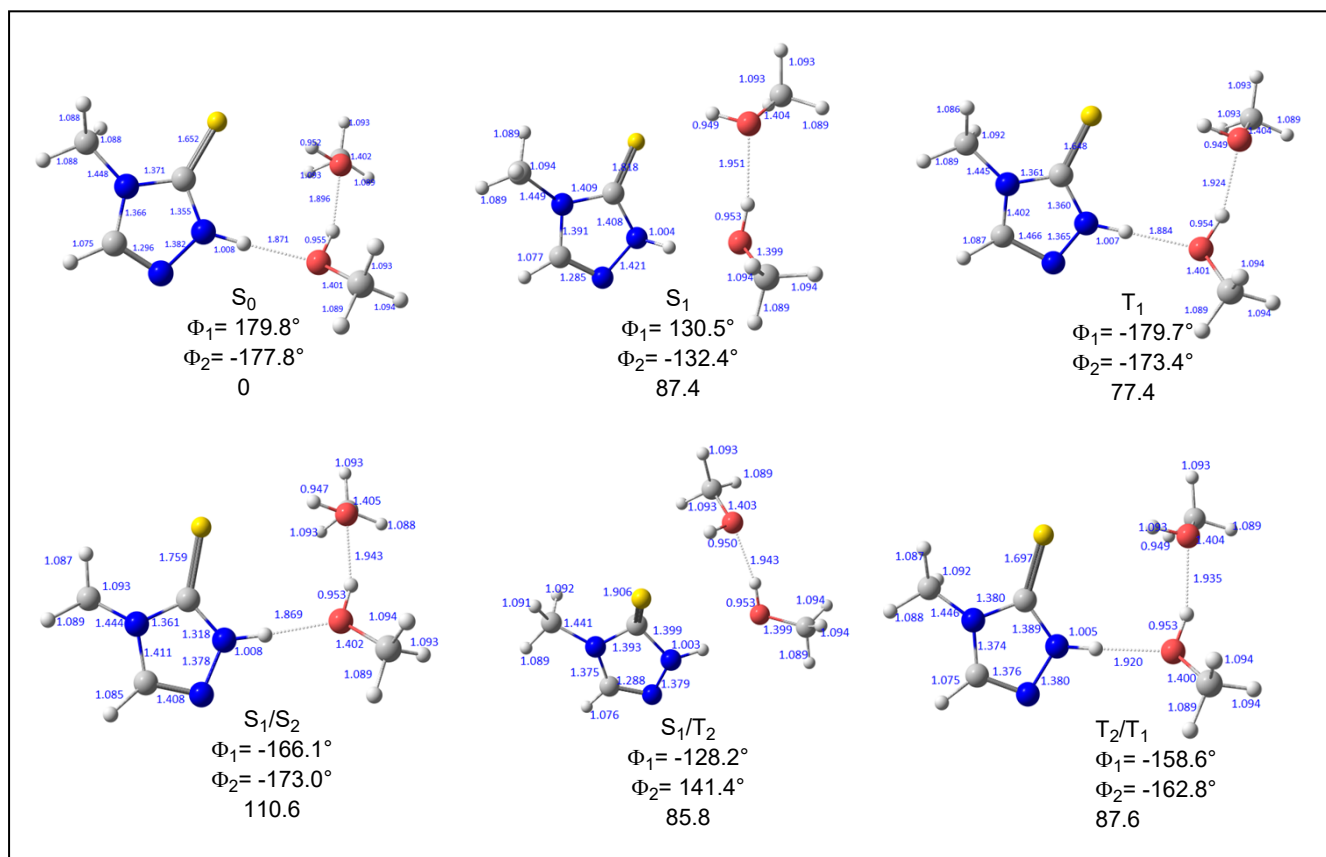

**Figure S9.** Optimized bond lengths and angles for different minimum structures ( $S_{2min}$ ,  $S_{1min}$ , and  $T_{1min}$ ), and CI points ( $S_2/S_1$ ,  $S_2/T_2$ ,  $S_1/T_2$ , and  $T_1/T_2$ ) at CASSCF(12e/9o)/cc-pVDZ level (the arrow in dotted points to the plane and the solid points out of the plane,  $\Phi_1 = D_{N4-C1-C5-S7}$ ,  $\Phi_2 = D_{C1-N5-N4-H9}$ ).



**Table S1.** Experimental and calculated vibrational frequencies at B3LYP-D3/6-311++G(d, p) level and assignments of 4MTTdimer.

| Mode<br>( $C_s$ ) | Calc.<br>(Raman activity/<br>IR intensity) | Exp.                  |             | Descriptions (PED%)                                                                                                                                                                                                                                                                                                                                                                    |
|-------------------|--------------------------------------------|-----------------------|-------------|----------------------------------------------------------------------------------------------------------------------------------------------------------------------------------------------------------------------------------------------------------------------------------------------------------------------------------------------------------------------------------------|
|                   |                                            | FT-<br>Raman          | FT-IR       |                                                                                                                                                                                                                                                                                                                                                                                        |
| v <sub>1</sub>    | 3263.3(0.001/1959.6)                       |                       |             | N <sub>2</sub> H <sub>6</sub> +N <sub>14</sub> H <sub>18</sub> stretch                                                                                                                                                                                                                                                                                                                 |
| v <sub>2</sub>    | 3260.4(333.6/0.04)                         |                       |             | N <sub>2</sub> H <sub>6</sub> +N <sub>14</sub> H <sub>18</sub> +C <sub>5</sub> H <sub>9</sub> +C <sub>17</sub> H <sub>21</sub> stretch                                                                                                                                                                                                                                                 |
| v <sub>3</sub>    | 3258.5(0.005/1172.5)                       |                       | 3120        | C <sub>5</sub> H <sub>9</sub> +C <sub>17</sub> H <sub>21</sub> stretch                                                                                                                                                                                                                                                                                                                 |
| v <sub>4</sub>    | 3214.1(1389.7/0.007)                       | 3128                  |             | N <sub>2</sub> H <sub>6</sub> +N <sub>14</sub> H <sub>18</sub> +C <sub>5</sub> H <sub>9</sub> +C <sub>17</sub> H <sub>21</sub> stretch                                                                                                                                                                                                                                                 |
| v <sub>5</sub>    | 3142.1(88.7/3.6)                           |                       |             | C <sub>8</sub> H <sub>11</sub> +C <sub>20</sub> H <sub>23</sub> stretch                                                                                                                                                                                                                                                                                                                |
| v <sub>6</sub>    | 3142.1(21.3/14.8)                          |                       |             | C <sub>8</sub> H <sub>11</sub> +C <sub>20</sub> H <sub>23</sub> stretch                                                                                                                                                                                                                                                                                                                |
| v <sub>7</sub>    | 3119.7(19.4/9.7)                           |                       |             | C <sub>8</sub> H <sub>10</sub> +C <sub>8</sub> H <sub>12</sub> +C <sub>20</sub> H <sub>22</sub> +C <sub>20</sub> H <sub>24</sub> stretch                                                                                                                                                                                                                                               |
| v <sub>8</sub>    | 3119.7(72.5/2.6)                           | 3085                  |             | C <sub>8</sub> H <sub>10</sub> +C <sub>8</sub> H <sub>12</sub> +C <sub>20</sub> H <sub>22</sub> +C <sub>20</sub> H <sub>24</sub> stretch                                                                                                                                                                                                                                               |
| v <sub>9</sub>    | 3050.6(349.3/0.003)                        | 2943                  |             | C <sub>8</sub> H <sub>10</sub> +C <sub>8</sub> H <sub>11</sub> +C <sub>8</sub> H <sub>12</sub> +C <sub>20</sub> H <sub>22</sub> +C <sub>20</sub> H <sub>23</sub> +C <sub>20</sub> H <sub>24</sub> stretch                                                                                                                                                                              |
| v <sub>10</sub>   | 3050.5(0.02/56.7)                          |                       | 2943        | C <sub>8</sub> H <sub>10</sub> +C <sub>8</sub> H <sub>11</sub> +C <sub>8</sub> H <sub>12</sub> +C <sub>20</sub> H <sub>22</sub> +C <sub>20</sub> H <sub>23</sub> +C <sub>20</sub> H <sub>24</sub> stretch                                                                                                                                                                              |
| v <sub>11</sub>   | 1604.1(28.5/0.0004)                        | 1552                  |             | N <sub>1</sub> C <sub>5</sub> stretch+N <sub>13</sub> C <sub>17</sub> stretch+H <sub>18</sub> N <sub>14</sub> N <sub>13</sub> bend+C <sub>3</sub> N <sub>2</sub> H <sub>6</sub> bend+N <sub>1</sub> N <sub>2</sub> H <sub>6</sub> bend                                                                                                                                                 |
| v <sub>12</sub>   | 1599.3(0.0001/132.2)                       |                       | 1552        | N <sub>1</sub> C <sub>5</sub> stretch+N <sub>13</sub> C <sub>17</sub> stretch+C <sub>3</sub> N <sub>2</sub> H <sub>6</sub> bend+N <sub>1</sub> N <sub>2</sub> H <sub>6</sub> bend                                                                                                                                                                                                      |
| v <sub>13</sub>   | 1540.5(0.0004/297.6)                       |                       | 1489        | N <sub>2</sub> C <sub>3</sub> stretch+N <sub>14</sub> C <sub>15</sub> stretch+H <sub>18</sub> N <sub>14</sub> N <sub>13</sub> bend+C <sub>3</sub> N <sub>2</sub> H <sub>6</sub> bend+N <sub>2</sub> H <sub>6</sub> S <sub>19</sub> C <sub>15</sub> tors+N <sub>1</sub> N <sub>2</sub> H <sub>6</sub> S <sub>19</sub> tors                                                              |
| v <sub>14</sub>   | 1532.3(44.5/0.002)                         | 1493                  |             | N <sub>2</sub> C <sub>3</sub> stretch+N <sub>14</sub> C <sub>15</sub> stretch+H <sub>18</sub> N <sub>14</sub> N <sub>13</sub> bend+C <sub>3</sub> N <sub>2</sub> H <sub>6</sub> bend+N <sub>2</sub> H <sub>6</sub> S <sub>19</sub> C <sub>15</sub> tors+N <sub>1</sub> N <sub>2</sub> H <sub>6</sub> S <sub>19</sub> tors                                                              |
| v <sub>15</sub>   | 1508.3(0.002/24.6)                         | <b>1423/<br/>1431</b> |             | H <sub>10</sub> C <sub>8</sub> H <sub>12</sub> bend+H <sub>22</sub> C <sub>20</sub> H <sub>24</sub> bend+H <sub>10</sub> C <sub>8</sub> N <sub>4</sub> C <sub>3</sub> tors+H <sub>12</sub> C <sub>8</sub> N <sub>4</sub> C <sub>3</sub> tors+H <sub>22</sub> C <sub>20</sub> N <sub>16</sub> C <sub>15</sub> tors+H <sub>24</sub> C <sub>20</sub> N <sub>16</sub> C <sub>15</sub> tors |
| v <sub>16</sub>   | 1507.6(20.9/0.003)                         |                       | <b>1425</b> | H <sub>10</sub> C <sub>8</sub> H <sub>12</sub> bend+H <sub>22</sub> C <sub>20</sub> H <sub>24</sub> bend+H <sub>10</sub> C <sub>8</sub> N <sub>4</sub> C <sub>3</sub> tors+H <sub>12</sub> C <sub>8</sub> N <sub>4</sub> C <sub>3</sub> tors+H <sub>22</sub> C <sub>20</sub> N <sub>16</sub> C <sub>15</sub> tors+H <sub>24</sub> C <sub>20</sub> N <sub>16</sub> C <sub>15</sub> tors |

|                 |                     |             |             |                                                                                                                                                                                                                                                                                                                                                                                                  |
|-----------------|---------------------|-------------|-------------|--------------------------------------------------------------------------------------------------------------------------------------------------------------------------------------------------------------------------------------------------------------------------------------------------------------------------------------------------------------------------------------------------|
| V <sub>17</sub> | 1473.9(10.8/11.2)   |             | <b>1425</b> | H <sub>11</sub> C <sub>8</sub> H <sub>10</sub> +H <sub>23</sub> C <sub>20</sub> H <sub>22</sub> bend                                                                                                                                                                                                                                                                                             |
| V <sub>18</sub> | 1473.9(6.9/17.5)    | <b>1394</b> |             | H <sub>11</sub> C <sub>8</sub> H <sub>10</sub> +H <sub>23</sub> C <sub>20</sub> H <sub>22</sub> bend                                                                                                                                                                                                                                                                                             |
| V <sub>19</sub> | 1469.0(0.001/16.5)  | <b>1394</b> |             | H <sub>11</sub> C <sub>8</sub> H <sub>10</sub> bend+H <sub>12</sub> C <sub>8</sub> H <sub>11</sub> bend+H <sub>23</sub> C <sub>20</sub> H <sub>22</sub> bend+H <sub>24</sub> C <sub>20</sub> H <sub>23</sub> bend+H <sub>11</sub> C <sub>8</sub> N <sub>4</sub> C <sub>3</sub> tors+ H <sub>23</sub> C <sub>20</sub> N <sub>16</sub> C <sub>15</sub> tors                                        |
| V <sub>20</sub> | 1468.4(15.1/0.001)  |             | <b>1390</b> | H <sub>11</sub> C <sub>8</sub> H <sub>10</sub> bend+H <sub>12</sub> C <sub>8</sub> H <sub>11</sub> bend+H <sub>23</sub> C <sub>20</sub> H <sub>22</sub> bend+H <sub>24</sub> C <sub>20</sub> H <sub>23</sub> bend+H <sub>11</sub> C <sub>8</sub> N <sub>4</sub> C <sub>3</sub> tors+ H <sub>23</sub> C <sub>20</sub> N <sub>16</sub> C <sub>15</sub> tors                                        |
| V <sub>21</sub> | 1411.0(53.9/0.0)    | 1361        |             | N <sub>1</sub> C <sub>5</sub> stretch+N <sub>13</sub> C <sub>17</sub> stretch+C <sub>3</sub> N <sub>2</sub> H <sub>6</sub> bend                                                                                                                                                                                                                                                                  |
| V <sub>22</sub> | 1405.5(0.0/61.6)    |             | <b>1361</b> | N <sub>1</sub> C <sub>5</sub> stretch+N <sub>13</sub> C <sub>17</sub> stretch+N <sub>4</sub> C <sub>8</sub> stretch+N <sub>16</sub> C <sub>20</sub> stretch+C <sub>3</sub> N <sub>2</sub> H <sub>6</sub> bend                                                                                                                                                                                    |
| V <sub>23</sub> | 1357.6(0.005/261.0) |             | 1323        | N <sub>16</sub> C <sub>17</sub> stretch+N <sub>4</sub> C <sub>5</sub> N <sub>1</sub> bend+N <sub>16</sub> C <sub>17</sub> N <sub>13</sub> bend+H <sub>18</sub> N <sub>14</sub> N <sub>13</sub> bend+C <sub>3</sub> N <sub>2</sub> H <sub>6</sub> bend+N <sub>1</sub> N <sub>2</sub> H <sub>6</sub> bend                                                                                          |
| V <sub>24</sub> | 1353.9(37.5/0.03)   | 1325        |             | N <sub>4</sub> C <sub>5</sub> N <sub>1</sub> bend+N <sub>16</sub> C <sub>17</sub> N <sub>13</sub> bend+C <sub>3</sub> N <sub>2</sub> H <sub>6</sub> bend+N <sub>1</sub> N <sub>2</sub> H <sub>6</sub> bend+N <sub>2</sub> H <sub>6</sub> S <sub>19</sub> C <sub>15</sub> tors+N <sub>1</sub> N <sub>2</sub> H <sub>6</sub> S <sub>19</sub> tors                                                  |
| V <sub>25</sub> | 1293.1(32.6/0.008)  | <b>1275</b> |             | N <sub>2</sub> C <sub>3</sub> stretch+N <sub>14</sub> C <sub>15</sub> stretch+C <sub>3</sub> N <sub>2</sub> H <sub>6</sub> bend+N <sub>2</sub> H <sub>6</sub> S <sub>19</sub> C <sub>15</sub> tors+N <sub>1</sub> N <sub>2</sub> H <sub>6</sub> S <sub>19</sub> tors                                                                                                                             |
| V <sub>26</sub> | 1287.6(0.004/82.5)  |             | <b>1267</b> | N <sub>2</sub> C <sub>3</sub> stretch+N <sub>14</sub> C <sub>15</sub> stretch+C <sub>3</sub> N <sub>2</sub> H <sub>6</sub> bend                                                                                                                                                                                                                                                                  |
| V <sub>27</sub> | 1251.1(0.0001/42.2) |             | <b>1219</b> | H <sub>9</sub> C <sub>5</sub> N <sub>1</sub> +H <sub>21</sub> C <sub>17</sub> N <sub>13</sub> bend                                                                                                                                                                                                                                                                                               |
| V <sub>28</sub> | 1250.4(18.1/0.0002) | <b>1216</b> |             | H <sub>9</sub> C <sub>5</sub> N <sub>1</sub> +H <sub>21</sub> C <sub>17</sub> N <sub>13</sub> bend                                                                                                                                                                                                                                                                                               |
| V <sub>29</sub> | 1179.2(0.0001/30.1) |             | 1151        | C <sub>15</sub> N <sub>14</sub> N <sub>13</sub> +N <sub>1</sub> N <sub>2</sub> H <sub>6</sub> bend                                                                                                                                                                                                                                                                                               |
| V <sub>30</sub> | 1167.4(32.3/0.0001) | 1149        |             | C <sub>15</sub> N <sub>14</sub> N <sub>13</sub> +N <sub>1</sub> N <sub>2</sub> H <sub>6</sub> bend                                                                                                                                                                                                                                                                                               |
| V <sub>31</sub> | 1150.6(0.1/0.1)     |             |             | H <sub>10</sub> C <sub>8</sub> N <sub>4</sub> C <sub>3</sub> +H <sub>11</sub> C <sub>8</sub> N <sub>4</sub> C <sub>3</sub> +H <sub>12</sub> C <sub>8</sub> N <sub>4</sub> C <sub>3</sub> +H <sub>22</sub> C <sub>20</sub> N <sub>16</sub> C <sub>15</sub> +H <sub>23</sub> C <sub>20</sub> N <sub>16</sub> C <sub>15</sub> +H <sub>24</sub> C <sub>20</sub> N <sub>16</sub> C <sub>15</sub> tors |
| V <sub>32</sub> | 1150.6(1.6/0.004)   |             |             | H <sub>10</sub> C <sub>8</sub> N <sub>4</sub> C <sub>3</sub> +H <sub>11</sub> C <sub>8</sub> N <sub>4</sub> C <sub>3</sub> +H <sub>12</sub> C <sub>8</sub> N <sub>4</sub> C <sub>3</sub> +H <sub>22</sub> C <sub>20</sub> N <sub>16</sub> C <sub>15</sub> +H <sub>23</sub> C <sub>20</sub> N <sub>16</sub> C <sub>15</sub> +H <sub>24</sub> C <sub>20</sub> N <sub>16</sub> C <sub>15</sub> tors |
| V <sub>33</sub> | 1106.5(6.2/0.0008)  | 1082        |             | N <sub>1</sub> N <sub>2</sub> +N <sub>14</sub> N <sub>13</sub> stretch                                                                                                                                                                                                                                                                                                                           |
| V <sub>34</sub> | 1105.2(0.0005/8.5)  |             | 1078        | N <sub>1</sub> N <sub>2</sub> +N <sub>14</sub> N <sub>13</sub> stretch                                                                                                                                                                                                                                                                                                                           |
| V <sub>35</sub> | 1062.0(9.2/0.0009)  | 1043        |             | N <sub>4</sub> C <sub>5</sub> N <sub>1</sub> bend+N <sub>16</sub> C <sub>17</sub> N <sub>13</sub>                                                                                                                                                                                                                                                                                                |

|                 |                     |      |                                                                                                                                                                                                                                                                                                                                                                                                                 |
|-----------------|---------------------|------|-----------------------------------------------------------------------------------------------------------------------------------------------------------------------------------------------------------------------------------------------------------------------------------------------------------------------------------------------------------------------------------------------------------------|
|                 |                     |      | bend+H <sub>10</sub> C <sub>8</sub> N <sub>4</sub> C <sub>3</sub> +H <sub>12</sub> C <sub>8</sub> N <sub>4</sub> C <sub>3</sub> +H <sub>22</sub> C <sub>20</sub> N <sub>16</sub> C <sub>15</sub> +H <sub>24</sub> C <sub>20</sub> N <sub>16</sub> C <sub>15</sub> tors                                                                                                                                          |
| V <sub>36</sub> | 1061.3(0.0001/63.5) | 1041 | N <sub>4</sub> C <sub>5</sub> N <sub>1</sub> bend+N <sub>16</sub> C <sub>17</sub> N <sub>13</sub>                                                                                                                                                                                                                                                                                                               |
| V <sub>37</sub> | 957.6(0.0001/72.6)  | 950  | bend+H <sub>10</sub> C <sub>8</sub> N <sub>4</sub> C <sub>3</sub> +H <sub>12</sub> C <sub>8</sub> N <sub>4</sub> C <sub>3</sub> +H <sub>22</sub> C <sub>20</sub> N <sub>16</sub> C <sub>15</sub> +H <sub>24</sub> C <sub>20</sub> N <sub>16</sub> C <sub>15</sub> tors                                                                                                                                          |
| V <sub>38</sub> | 952.2(29.5/0.0002)  | 941  | N <sub>4</sub> C <sub>5</sub> N <sub>1</sub> +N <sub>16</sub> C <sub>17</sub> N <sub>13</sub> +C <sub>5</sub> N <sub>1</sub> N <sub>2</sub> +N <sub>14</sub> N <sub>13</sub> C <sub>17</sub> bend                                                                                                                                                                                                               |
| V <sub>39</sub> | 832.6(0.0/86.4)     | 881  | N <sub>2</sub> H <sub>6</sub> S <sub>19</sub> C <sub>15</sub> +H <sub>9</sub> C <sub>5</sub> N <sub>1</sub> N <sub>2</sub> +H <sub>21</sub> C <sub>17</sub> N <sub>13</sub> N <sub>14</sub> +N <sub>1</sub> N <sub>2</sub> H <sub>6</sub> S <sub>19</sub> tors                                                                                                                                                  |
| V <sub>40</sub> | 827.7(0.4/0.002)    |      | N <sub>2</sub> H <sub>6</sub> S <sub>19</sub> C <sub>15</sub> +H <sub>9</sub> C <sub>5</sub> N <sub>1</sub> N <sub>2</sub> +H <sub>21</sub> C <sub>17</sub> N <sub>13</sub> N <sub>14</sub> +N <sub>1</sub> N <sub>2</sub> H <sub>6</sub> S <sub>19</sub> tors                                                                                                                                                  |
| V <sub>41</sub> | 810.9(0.0/13.5)     | 852  | N <sub>2</sub> H <sub>6</sub> S <sub>19</sub> C <sub>15</sub> +H <sub>18</sub> N <sub>14</sub> N <sub>13</sub> C <sub>17</sub> +C <sub>5</sub> N <sub>1</sub> N <sub>2</sub> H <sub>6</sub> +H <sub>6</sub> N <sub>2</sub> C <sub>3</sub> N <sub>4</sub> +N <sub>1</sub> N <sub>2</sub> H <sub>6</sub> S <sub>19</sub> tors                                                                                     |
| V <sub>42</sub> | 793.6(5.3/0.0)      | 852  | N <sub>2</sub> H <sub>6</sub> S <sub>19</sub> C <sub>15</sub> +H <sub>18</sub> N <sub>14</sub> N <sub>13</sub> C <sub>17</sub> +C <sub>5</sub> N <sub>1</sub> N <sub>2</sub> H <sub>6</sub> +H <sub>6</sub> N <sub>2</sub> C <sub>3</sub> N <sub>4</sub> +N <sub>1</sub> N <sub>2</sub> H <sub>6</sub> S <sub>19</sub> tors                                                                                     |
| V <sub>43</sub> | 705.0(0.0/8.4)      | 690  | N <sub>4</sub> C <sub>8</sub> stretch+N <sub>16</sub> C <sub>20</sub> stretch+N <sub>4</sub> C <sub>5</sub> N <sub>1</sub> bend+N <sub>16</sub> C <sub>17</sub> N <sub>13</sub> bend                                                                                                                                                                                                                            |
| V <sub>44</sub> | 701.8(31.4/0.0)     | 698  | N <sub>4</sub> C <sub>8</sub> stretch+N <sub>16</sub> C <sub>20</sub> stretch+N <sub>4</sub> C <sub>5</sub> N <sub>1</sub> bend+N <sub>16</sub> C <sub>17</sub> N <sub>13</sub> bend                                                                                                                                                                                                                            |
| V <sub>45</sub> | 674.3(3.5/0.0)      |      | N <sub>2</sub> H <sub>6</sub> S <sub>19</sub> C <sub>15</sub> tors+C <sub>5</sub> N <sub>1</sub> N <sub>2</sub> H <sub>6</sub> tors+C <sub>15</sub> N <sub>14</sub> N <sub>13</sub> C <sub>17</sub> tors+N <sub>1</sub> N <sub>2</sub> H <sub>6</sub> S <sub>19</sub> tors+S <sub>7</sub> N <sub>2</sub> N <sub>4</sub> C <sub>3</sub> out+ S <sub>19</sub> N <sub>14</sub> N <sub>16</sub> C <sub>15</sub> out |
| V <sub>46</sub> | 673.2(0.0/8.6)      | 673  | N <sub>2</sub> H <sub>6</sub> S <sub>19</sub> C <sub>15</sub> tors+C <sub>5</sub> N <sub>1</sub> N <sub>2</sub> H <sub>6</sub> tors+C <sub>15</sub> N <sub>14</sub> N <sub>13</sub> C <sub>17</sub> tors+N <sub>1</sub> N <sub>2</sub> H <sub>6</sub> S <sub>19</sub> tors+S <sub>7</sub> N <sub>2</sub> N <sub>4</sub> C <sub>3</sub> out+ S <sub>19</sub> N <sub>14</sub> N <sub>16</sub> C <sub>15</sub> out |
| V <sub>47</sub> | 638.8(0.6/0.0)      |      | N <sub>2</sub> H <sub>6</sub> S <sub>19</sub> C <sub>15</sub> +N <sub>4</sub> C <sub>5</sub> N <sub>1</sub> N <sub>2</sub> +N <sub>16</sub> C <sub>17</sub> N <sub>13</sub> N <sub>14</sub> +N <sub>1</sub> N <sub>2</sub> H <sub>6</sub> S <sub>19</sub> tors                                                                                                                                                  |
| V <sub>48</sub> | 638.7(0.0/5.8)      |      | N <sub>2</sub> H <sub>6</sub> S <sub>19</sub> C <sub>15</sub> +N <sub>4</sub> C <sub>5</sub> N <sub>1</sub> N <sub>2</sub> +N <sub>16</sub> C <sub>17</sub> N <sub>13</sub> N <sub>14</sub> +N <sub>1</sub> N <sub>2</sub> H <sub>6</sub> S <sub>19</sub> tors                                                                                                                                                  |
| V <sub>49</sub> | 542.0(0.0001/28.8)  | 542  | S <sub>7</sub> C <sub>3</sub> stretch+S <sub>19</sub> C <sub>15</sub> stretch+C <sub>15</sub> N <sub>14</sub> N <sub>13</sub> bend                                                                                                                                                                                                                                                                              |
| V <sub>50</sub> | 539.6(17.4/0.0001)  | 544  | S <sub>7</sub> C <sub>3</sub> stretch+S <sub>19</sub> C <sub>15</sub> stretch+C <sub>15</sub> N <sub>14</sub> N <sub>13</sub> bend                                                                                                                                                                                                                                                                              |
| V <sub>51</sub> | 431.1(0.0/1.2)      |      | S <sub>7</sub> C <sub>3</sub> N <sub>4</sub> bend+C <sub>8</sub> N <sub>4</sub> C <sub>5</sub> bend+C <sub>20</sub> N <sub>16</sub> C <sub>17</sub> bend+S <sub>19</sub> C <sub>15</sub> N <sub>16</sub> bend+N <sub>2</sub> H <sub>6</sub> S <sub>19</sub> C <sub>15</sub> tors+ N <sub>1</sub> N <sub>2</sub> H <sub>6</sub> S <sub>19</sub> tors                                                             |
| V <sub>52</sub> | 418.1(2.2/0.0)      | 422  | S <sub>7</sub> C <sub>3</sub> N <sub>4</sub> bend+C <sub>8</sub> N <sub>4</sub> C <sub>5</sub> bend+S <sub>19</sub> C <sub>15</sub> N <sub>16</sub> bend+C <sub>20</sub> N <sub>16</sub> C <sub>17</sub> bend                                                                                                                                                                                                   |
| V <sub>53</sub> | 262.2(0.0/26.7)     |      | S <sub>7</sub> C <sub>3</sub> N <sub>4</sub> bend+C <sub>8</sub> N <sub>4</sub> C <sub>5</sub> bend+C <sub>20</sub> N <sub>16</sub> C <sub>17</sub> bend+S <sub>19</sub> C <sub>15</sub> N <sub>16</sub> bend+N <sub>2</sub> H <sub>6</sub> S <sub>19</sub> C <sub>15</sub> tors                                                                                                                                |
| V <sub>54</sub> | 248.7(6.3/0.0)      | 251  | S <sub>7</sub> C <sub>3</sub> N <sub>4</sub> bend+C <sub>8</sub> N <sub>4</sub> C <sub>5</sub> bend+C <sub>20</sub> N <sub>16</sub> C <sub>17</sub> bend+S <sub>19</sub> C <sub>15</sub> N <sub>16</sub> bend+N <sub>2</sub> H <sub>6</sub> S <sub>19</sub> C <sub>15</sub> tors                                                                                                                                |
| V <sub>55</sub> | 231.5(0.2/0.0)      |      | N <sub>2</sub> H <sub>6</sub> S <sub>19</sub> C <sub>15</sub> tors+C <sub>5</sub> N <sub>1</sub> N <sub>2</sub> H <sub>6</sub> tors+C <sub>15</sub> N <sub>14</sub> N <sub>13</sub> C <sub>17</sub> tors+N <sub>1</sub> N <sub>2</sub> H <sub>6</sub> S <sub>19</sub>                                                                                                                                           |

|                 |                   |                                                                                                                                                                                                                                                                                                                                                                                                                                                                                             |
|-----------------|-------------------|---------------------------------------------------------------------------------------------------------------------------------------------------------------------------------------------------------------------------------------------------------------------------------------------------------------------------------------------------------------------------------------------------------------------------------------------------------------------------------------------|
| V <sub>56</sub> | 230.4(0.0/0.03)   | tors+S <sub>7</sub> N <sub>2</sub> N <sub>4</sub> C <sub>3</sub> out+ S <sub>19</sub> N <sub>14</sub> N <sub>16</sub> C <sub>15</sub> out<br>C <sub>5</sub> N <sub>1</sub> N <sub>2</sub> H <sub>6</sub> tors+H <sub>6</sub> N <sub>2</sub> C <sub>3</sub> N <sub>4</sub> tors+C <sub>15</sub> N <sub>14</sub> N <sub>13</sub> C <sub>17</sub> tors+S <sub>7</sub> N <sub>2</sub> N <sub>4</sub> C <sub>3</sub> out+<br>S <sub>19</sub> N <sub>14</sub> N <sub>16</sub> C <sub>15</sub> out |
| V <sub>57</sub> | 199.3(1.1/0.0)    | N <sub>2</sub> H <sub>6</sub> S <sub>19</sub> C <sub>15</sub> tors+C <sub>5</sub> N <sub>1</sub> N <sub>2</sub> H <sub>6</sub> tors+H <sub>6</sub> N <sub>2</sub> C <sub>3</sub> N <sub>4</sub> tors+N <sub>1</sub> N <sub>2</sub> H <sub>6</sub> S <sub>19</sub><br>tors+C <sub>20</sub> C <sub>15</sub> C <sub>17</sub> N <sub>16</sub> out+ C <sub>8</sub> C <sub>3</sub> C <sub>5</sub> N <sub>4</sub> out                                                                              |
| V <sub>58</sub> | 198.2(0.0/1.2)    | N <sub>2</sub> H <sub>6</sub> S <sub>19</sub> C <sub>15</sub> tors+C <sub>5</sub> N <sub>1</sub> N <sub>2</sub> H <sub>6</sub> tors+H <sub>6</sub> N <sub>2</sub> C <sub>3</sub> N <sub>4</sub> tors+N <sub>1</sub> N <sub>2</sub> H <sub>6</sub> S <sub>19</sub><br>tors+C <sub>20</sub> C <sub>15</sub> C <sub>17</sub> N <sub>16</sub> out+ C <sub>8</sub> C <sub>3</sub> C <sub>5</sub> N <sub>4</sub> out                                                                              |
| V <sub>59</sub> | 113.3(0.9/0.0)    | H <sub>10</sub> C <sub>8</sub> N <sub>4</sub> C <sub>3</sub> +H <sub>11</sub> C <sub>8</sub> N <sub>4</sub> C <sub>3</sub> +H <sub>12</sub> C <sub>8</sub> N <sub>4</sub> C <sub>3</sub> +H <sub>22</sub> C <sub>20</sub> N <sub>16</sub> C <sub>15</sub> +H <sub>23</sub> C <sub>20</sub> N <sub>16</sub> C <sub>15</sub> +H <sub>24</sub> C <sub>20</sub> N <sub>16</sub><br>C <sub>15</sub> tors                                                                                         |
| V <sub>60</sub> | 104.7(0.0002/0.1) | H <sub>10</sub> C <sub>8</sub> N <sub>4</sub> C <sub>3</sub> +H <sub>11</sub> C <sub>8</sub> N <sub>4</sub> C <sub>3</sub> +H <sub>12</sub> C <sub>8</sub> N <sub>4</sub> C <sub>3</sub> +H <sub>22</sub> C <sub>20</sub> N <sub>16</sub> C <sub>15</sub> +H <sub>23</sub> C <sub>20</sub> N <sub>16</sub> C <sub>15</sub> +H <sub>24</sub> C <sub>20</sub> N <sub>16</sub><br>C <sub>15</sub> tors                                                                                         |
| V <sub>61</sub> | 104.3(0.9/0.0)    | S <sub>19</sub> H <sub>6</sub> stretch+N <sub>2</sub> H <sub>6</sub> S <sub>19</sub> bend+H <sub>6</sub> S <sub>19</sub> C <sub>15</sub> bend+N <sub>2</sub> H <sub>6</sub> S <sub>19</sub> C <sub>15</sub> tors+N <sub>1</sub> N <sub>2</sub> H <sub>6</sub> S <sub>19</sub> tors                                                                                                                                                                                                          |
| V <sub>62</sub> | 83.2(0.0/12.0)    | N <sub>2</sub> H <sub>6</sub> S <sub>19</sub> bend+H <sub>6</sub> S <sub>19</sub> C <sub>15</sub> bend+N <sub>2</sub> H <sub>6</sub> S <sub>19</sub> C <sub>15</sub> tors+N <sub>1</sub> N <sub>2</sub> H <sub>6</sub> S <sub>19</sub> tors                                                                                                                                                                                                                                                 |
| V <sub>63</sub> | 78.3(1.7/0.0)     | S <sub>19</sub> H <sub>6</sub> stretch+N <sub>2</sub> H <sub>6</sub> S <sub>19</sub> bend+H <sub>6</sub> S <sub>19</sub> C <sub>15</sub> bend+N <sub>2</sub> H <sub>6</sub> S <sub>19</sub> C <sub>15</sub> tors+N <sub>1</sub> N <sub>2</sub> H <sub>6</sub> S <sub>19</sub> tors                                                                                                                                                                                                          |
| V <sub>64</sub> | 45.9(2.6/0.0)     | N <sub>2</sub> H <sub>6</sub> S <sub>19</sub> bend+N <sub>2</sub> H <sub>6</sub> S <sub>19</sub> C <sub>15</sub> tors+H <sub>6</sub> S <sub>19</sub> C <sub>15</sub> N <sub>14</sub> tors+C <sub>5</sub> N <sub>1</sub> N <sub>2</sub> H <sub>6</sub> tors+H <sub>6</sub> N <sub>2</sub> C <sub>3</sub> N <sub>4</sub><br>tors+ N <sub>1</sub> N <sub>2</sub> H <sub>6</sub> S <sub>19</sub> tors                                                                                           |
| V <sub>65</sub> | 34.5(0.0/4.2)     | N <sub>2</sub> H <sub>6</sub> S <sub>19</sub> C <sub>15</sub> tors+C <sub>5</sub> N <sub>1</sub> N <sub>2</sub> H <sub>6</sub> tors+H <sub>6</sub> N <sub>2</sub> C <sub>3</sub> N <sub>4</sub> tors+ N <sub>1</sub> N <sub>2</sub> H <sub>6</sub> S <sub>19</sub> tors                                                                                                                                                                                                                     |
| V <sub>66</sub> | 7.8(0.0/6.2)      | N <sub>2</sub> H <sub>6</sub> S <sub>19</sub> C <sub>15</sub> tors+H <sub>6</sub> S <sub>19</sub> C <sub>15</sub> N <sub>14</sub> tors+C <sub>5</sub> N <sub>1</sub> N <sub>2</sub> H <sub>6</sub> tors+H <sub>6</sub> N <sub>2</sub> C <sub>3</sub> N <sub>4</sub> tors+<br>N <sub>1</sub> N <sub>2</sub> H <sub>6</sub> S <sub>19</sub> tors                                                                                                                                              |

---

PED=potential energy distribution, only contributions larger than 10% were given.

**Table S2.** The assignments of 488 nm Raman in different solvents and calculated spectra at B3LYP-D3(BJ)/6-311++G(d, p)level for 4MTT(H<sub>2</sub>O)<sub>2</sub>.

| Mode            | Exp.                  |                       |                     | Cal.                          | Descriptions (PED%)                                                                                                                                                                                                                                                                                                                  |
|-----------------|-----------------------|-----------------------|---------------------|-------------------------------|--------------------------------------------------------------------------------------------------------------------------------------------------------------------------------------------------------------------------------------------------------------------------------------------------------------------------------------|
|                 | In CH <sub>3</sub> CN | In CH <sub>3</sub> OH | In H <sub>2</sub> O | (Raman activity/IR intensity) |                                                                                                                                                                                                                                                                                                                                      |
| v <sub>1</sub>  |                       |                       |                     | 3274(220.9/1.0)               | C <sub>5</sub> H <sub>9</sub> (99)stretch                                                                                                                                                                                                                                                                                            |
| v <sub>2</sub>  |                       |                       |                     | 3172(424.9/1534.0)            | N <sub>2</sub> H <sub>6</sub> (93)stretch                                                                                                                                                                                                                                                                                            |
| v <sub>3</sub>  |                       |                       |                     | 3165(122.4/10.3)              | C <sub>8</sub> H <sub>10</sub> (11)+C <sub>8</sub> H <sub>11</sub> (79)+C <sub>8</sub> H <sub>12</sub> (11)stretch                                                                                                                                                                                                                   |
| v <sub>4</sub>  |                       |                       |                     | 3137(97.5/11.1)               | C <sub>8</sub> H <sub>10</sub> (50)+C <sub>8</sub> H <sub>12</sub> (50)stretch                                                                                                                                                                                                                                                       |
| v <sub>5</sub>  |                       |                       |                     | 3066(342.1/29.0)              | C <sub>8</sub> H <sub>10</sub> (39)+C <sub>8</sub> H <sub>11</sub> (21)+C <sub>8</sub> H <sub>12</sub> (39)stretch                                                                                                                                                                                                                   |
| v <sub>6</sub>  | 1556(m)               | 1559(w)               | 1561(w)             | 1544(125.6/267.9)             | N <sub>1</sub> C <sub>5</sub> (14)stretch+N <sub>2</sub> C <sub>3</sub> (17)stretch+N <sub>4</sub> C <sub>5</sub> (12)stretch+<br>H <sub>6</sub> N <sub>2</sub> N <sub>1</sub> (16)bend                                                                                                                                              |
| v <sub>7</sub>  | 1480(w)               | 1498(m)               | 1500(vs)            | 1503(21.4/35.6)               | H <sub>10</sub> C <sub>8</sub> H <sub>12</sub> (52)bend+H <sub>11</sub> C <sub>8</sub> H <sub>10</sub> (12)bend+H <sub>10</sub> C <sub>8</sub> N <sub>4</sub> C <sub>3</sub> (11)tors+<br>H <sub>12</sub> C <sub>8</sub> N <sub>4</sub> C <sub>3</sub> (10)tors                                                                      |
| v <sub>8</sub>  |                       |                       |                     | 1470(17.6/21.0)               | H <sub>11</sub> C <sub>8</sub> H <sub>10</sub> (47)bend+H <sub>12</sub> C <sub>8</sub> H <sub>11</sub> (27)bend+H <sub>11</sub> C <sub>8</sub> N <sub>4</sub> C <sub>3</sub> (18)tors                                                                                                                                                |
| v <sub>9</sub>  | 1427(vw)              | 1425(w)               | 1428(s)             | 1466(41.5/18.4)               | N <sub>1</sub> C <sub>5</sub> (20)stretch+H <sub>10</sub> C <sub>8</sub> H <sub>12</sub> (14)bend+H <sub>11</sub> C <sub>8</sub> H <sub>10</sub> (14)bend+<br>H <sub>12</sub> C <sub>8</sub> H <sub>11</sub> (40)bend                                                                                                                |
| v <sub>10</sub> | 1362(m)               | 1365(m)               | 1365(m)             | 1411(38.4/24.2)               | N <sub>1</sub> C <sub>5</sub> (26)+N <sub>4</sub> C <sub>5</sub> (21)+N <sub>4</sub> C <sub>8</sub> (15)stretch                                                                                                                                                                                                                      |
| v <sub>11</sub> | 1326(w)               | 1334(s)               | 1339(vs)            | 1362(156.9/276.5)             | N <sub>4</sub> C <sub>5</sub> N <sub>1</sub> (14)+C <sub>3</sub> N <sub>2</sub> N <sub>1</sub> (14)bend                                                                                                                                                                                                                              |
| v <sub>12</sub> | 1255(w)               | 1274(m)               | 1284(m)             | 1301(51.7/36.5)               | N <sub>2</sub> C <sub>3</sub> (49)+N <sub>4</sub> C <sub>5</sub> (15)stretch                                                                                                                                                                                                                                                         |
| v <sub>13</sub> | 1224(vw)              | 1225(vw)              | 1227 (vw)           | 1254(14.8/56.9)               | N <sub>4</sub> C <sub>8</sub> (12)stretch+H <sub>9</sub> C <sub>5</sub> N <sub>1</sub> (67)bend                                                                                                                                                                                                                                      |
| v <sub>14</sub> | 1154(vw)              | 1154(w)               | 1157(w)             | 1176(25.7/71.7)               | N <sub>4</sub> C <sub>8</sub> (11)stretch+S <sub>7</sub> C <sub>3</sub> (17)stretch+C <sub>3</sub> N <sub>2</sub> N <sub>1</sub> (39)bend                                                                                                                                                                                            |
| v <sub>15</sub> |                       |                       |                     | 1150(1.4/0.1)                 | H <sub>11</sub> C <sub>8</sub> H <sub>10</sub> (18)bend+H <sub>12</sub> C <sub>8</sub> H <sub>11</sub> (16)bend+H <sub>10</sub> C <sub>8</sub> N <sub>4</sub> C <sub>3</sub> (17)tors<br>H <sub>11</sub> C <sub>8</sub> N <sub>4</sub> C <sub>3</sub> (31)tors+H <sub>12</sub> C <sub>8</sub> N <sub>4</sub> C <sub>3</sub> (17)tors |
| v <sub>16</sub> | 1071(vvw)             | 1074(vw)              | 1078(vvw)           | 1107(7.4/15.7)                | N <sub>2</sub> N <sub>1</sub> (65)stretch                                                                                                                                                                                                                                                                                            |
| v <sub>17</sub> | 1036(vw)              | 1049(vvw)             | 1047(vvw)           | 1067(14.1/87.1)               | N <sub>4</sub> C <sub>5</sub> (17)stretch+N <sub>2</sub> N <sub>1</sub> (14)stretch+N <sub>4</sub> C <sub>5</sub> N <sub>1</sub> (15)bend+H <sub>10</sub> C <sub>8</sub> N <sub>4</sub> C <sub>3</sub> (1                                                                                                                            |

|                   |          |          |          |                    |                                                                                                                                                                                                                                                                                          |
|-------------------|----------|----------|----------|--------------------|------------------------------------------------------------------------------------------------------------------------------------------------------------------------------------------------------------------------------------------------------------------------------------------|
| v <sub>18</sub>   | 935(s)   | 935(s)   | 946(s)   | 961(27.7/55.7)     | 2)tors+H <sub>12</sub> C <sub>8</sub> N <sub>4</sub> C <sub>3</sub> (12)tors<br>N <sub>4</sub> C <sub>5</sub> N <sub>1</sub> (13)+N <sub>2</sub> N <sub>1</sub> C <sub>5</sub> (61)bend                                                                                                  |
| v <sub>19</sub>   |          |          |          | 854(2.1/13.8)      | H <sub>9</sub> C <sub>5</sub> N <sub>1</sub> N <sub>2</sub> (80)tors                                                                                                                                                                                                                     |
| v <sub>20</sub>   | 689(vvs) | 689(vvs) | 688(vvs) | 701(32.2/5.2)      | N <sub>4</sub> C <sub>8</sub> (46)stretch+N <sub>4</sub> C <sub>5</sub> N <sub>1</sub> (22)bend                                                                                                                                                                                          |
| v <sub>21</sub>   |          |          |          | 682(3.6/9.7)       | C <sub>3</sub> N <sub>2</sub> N <sub>1</sub> C <sub>5</sub> (38)tors+S <sub>7</sub> N <sub>2</sub> N <sub>4</sub> C <sub>3</sub> (46)out                                                                                                                                                 |
| v <sub>22</sub>   |          |          |          | 646(1.0/5.7)       | H <sub>9</sub> C <sub>5</sub> N <sub>1</sub> N <sub>2</sub> (12)+N <sub>4</sub> C <sub>5</sub> N <sub>1</sub> N <sub>2</sub> (75)tors                                                                                                                                                    |
| v <sub>23</sub>   | 535(vs)  | 535(vs)  | 530(m)   | 535(13.7/29.1)     | S <sub>7</sub> C <sub>3</sub> (55)stretch+C <sub>3</sub> N <sub>2</sub> N <sub>1</sub> (14)bend+C <sub>8</sub> N <sub>4</sub> C <sub>5</sub> (11)bend                                                                                                                                    |
| v <sub>24</sub>   | 402(m)   | 402(w)   | 404(w)   | 420(4.1/8.7)       | S <sub>7</sub> C <sub>3</sub> N <sub>4</sub> (21)+C <sub>8</sub> N <sub>4</sub> C <sub>5</sub> (41)bend                                                                                                                                                                                  |
| v <sub>25</sub>   | 238(s)   | 240(m)   | 243(m)   | 207(2.2/4.4)       | H <sub>11</sub> C <sub>8</sub> N <sub>4</sub> C <sub>3</sub> (10)tors+C <sub>3</sub> N <sub>2</sub> N <sub>1</sub> C <sub>5</sub> (30)tors+<br>C <sub>8</sub> C <sub>3</sub> C <sub>5</sub> N <sub>4</sub> (35)out+S <sub>7</sub> N <sub>2</sub> N <sub>4</sub> C <sub>3</sub> (10)out   |
| v <sub>26</sub>   |          |          |          | 105(0.8/0.2)       | H <sub>10</sub> C <sub>8</sub> N <sub>4</sub> C <sub>3</sub> (25)tors+H <sub>11</sub> C <sub>8</sub> N <sub>4</sub> C <sub>3</sub> (27)tors+H <sub>12</sub> C <sub>8</sub> N <sub>4</sub> C <sub>3</sub> (25)tors+C <sub>8</sub> C <sub>3</sub><br>C <sub>5</sub> N <sub>4</sub> (20)out |
| v <sub>1</sub> '  |          |          |          | 3858(114.2/99.6)   | O <sub>13</sub> H <sub>15</sub> (99)stretch                                                                                                                                                                                                                                              |
| v <sub>2</sub> '  |          |          |          | 3849(95.0/132.5)   | O <sub>16</sub> H <sub>17</sub> (98)stretch                                                                                                                                                                                                                                              |
| v <sub>3</sub> '  |          |          |          | 3477(512.9/1326.0) | O <sub>13</sub> H <sub>14</sub> (28)+O <sub>16</sub> H <sub>18</sub> (71)stretch                                                                                                                                                                                                         |
| v <sub>4</sub> '  |          |          |          | 3418(359.0/1095.1) | O <sub>13</sub> H <sub>14</sub> (66)+O <sub>16</sub> H <sub>18</sub> (27)stretch                                                                                                                                                                                                         |
| v <sub>5</sub> '  |          |          |          | 1640(2.7/17.6)     | H <sub>15</sub> O <sub>13</sub> H <sub>6</sub> N <sub>2</sub> (38)+H <sub>14</sub> O <sub>13</sub> H <sub>6</sub> N <sub>2</sub> (13)tors                                                                                                                                                |
| v <sub>6</sub> '  |          |          |          | 1610(8.7/108.4)    | H <sub>17</sub> O <sub>16</sub> H <sub>18</sub> (38)bend+H <sub>6</sub> N <sub>2</sub> N <sub>1</sub> (15)bend+H <sub>15</sub> O <sub>13</sub> H <sub>6</sub> N <sub>2</sub> (10)tors                                                                                                    |
| v <sub>7</sub> '  |          |          |          | 1606(17.4/156.5)   | H <sub>17</sub> O <sub>16</sub> H <sub>18</sub> (47)bend+H <sub>15</sub> O <sub>13</sub> H <sub>6</sub> N <sub>2</sub> (19)tors                                                                                                                                                          |
| v <sub>8</sub> '  |          |          |          | 910(1.2/161.7)     | O <sub>13</sub> H <sub>6</sub> N <sub>2</sub> (31)bend+H <sub>15</sub> O <sub>13</sub> H <sub>6</sub> (19)bend+H <sub>6</sub> N <sub>2</sub> N <sub>1</sub> C <sub>5</sub> (29)tors                                                                                                      |
| v <sub>9</sub> '  |          |          |          | 860(1.7/218.0)     | O <sub>16</sub> H <sub>14</sub> O <sub>13</sub> (32)bend+H <sub>17</sub> O <sub>16</sub> H <sub>18</sub> S <sub>7</sub> (10)tors+<br>H <sub>18</sub> O <sub>16</sub> H <sub>14</sub> O <sub>13</sub> (12)tors+O <sub>16</sub> H <sub>14</sub> O <sub>13</sub> N <sub>2</sub> (12)tors    |
| v <sub>10</sub> ' |          |          |          | 644(6.7/201.7)     | H <sub>18</sub> O <sub>16</sub> H <sub>14</sub> (38)bend+O <sub>16</sub> H <sub>14</sub> O <sub>13</sub> (20)bend+<br>H <sub>17</sub> O <sub>16</sub> H <sub>18</sub> S <sub>7</sub> (11)tors+H <sub>18</sub> O <sub>16</sub> H <sub>14</sub> O <sub>13</sub> (10)tors                   |
| v <sub>11</sub> ' |          |          |          | 462(1.8/99.6)      | H <sub>15</sub> O <sub>13</sub> H <sub>6</sub> (14)bend+O <sub>16</sub> H <sub>14</sub> O <sub>13</sub> (11)bend+ H <sub>18</sub> O <sub>16</sub> H <sub>14</sub> O <sub>13</sub> (21)tors+<br>O <sub>16</sub> H <sub>14</sub> O <sub>13</sub> N <sub>2</sub> (18)tors                   |
| v <sub>12</sub> ' |          |          |          | 348(1.9/40.4)      | H <sub>17</sub> O <sub>16</sub> H <sub>18</sub> S <sub>7</sub> (28)+H <sub>18</sub> O <sub>16</sub> H <sub>14</sub> O <sub>13</sub> (13)+O <sub>16</sub> H <sub>14</sub> O <sub>13</sub> N <sub>2</sub> (22)tors                                                                         |
| v <sub>13</sub> ' |          |          |          | 296(0.4/174.7)     | H <sub>15</sub> O <sub>13</sub> H <sub>6</sub> (40)bend+H <sub>17</sub> O <sub>16</sub> H <sub>18</sub> S <sub>7</sub> (15)tors                                                                                                                                                          |

|                   |                |                                                                                                                                                                                                                                                                                |
|-------------------|----------------|--------------------------------------------------------------------------------------------------------------------------------------------------------------------------------------------------------------------------------------------------------------------------------|
| v <sub>14</sub> ' | 255(2.6/30.2)  | O <sub>16</sub> H <sub>14</sub> (16)stretch+S <sub>7</sub> C <sub>3</sub> N <sub>4</sub> (22)bend+C <sub>8</sub> N <sub>4</sub> C <sub>5</sub> (12)bend                                                                                                                        |
| v <sub>15</sub> ' | 250(1.3/117.1) | S <sub>7</sub> C <sub>3</sub> N <sub>4</sub> (11)bend+H <sub>17</sub> O <sub>16</sub> H <sub>18</sub> S <sub>7</sub> (16)tors+H <sub>18</sub> O <sub>16</sub> H <sub>14</sub> O <sub>13</sub> (17)tors+O <sub>16</sub> H <sub>14</sub> O <sub>13</sub> N <sub>2</sub> (15)tors |
| v <sub>16</sub> ' | 245(0.9/57.5)  | O <sub>16</sub> H <sub>14</sub> (42)stretch+C <sub>8</sub> C <sub>3</sub> C <sub>5</sub> N <sub>4</sub> (10)out                                                                                                                                                                |
| v <sub>17</sub> ' | 244(0.1/70.3)  | O <sub>16</sub> H <sub>14</sub> (16)stretch+C <sub>8</sub> C <sub>3</sub> C <sub>5</sub> N <sub>4</sub> (15)out+S <sub>7</sub> N <sub>2</sub> N <sub>4</sub> C <sub>3</sub> (24)out                                                                                            |
| v <sub>18</sub> ' | 185(0.4/23.5)  | O <sub>13</sub> H <sub>6</sub> (84)stretch                                                                                                                                                                                                                                     |
| v <sub>19</sub> ' | 147(0.7/17.2)  | S <sub>7</sub> C <sub>3</sub> N <sub>4</sub> (11)bend+H <sub>14</sub> O <sub>13</sub> H <sub>6</sub> (36)bend+O <sub>13</sub> H <sub>6</sub> N <sub>2</sub> C <sub>3</sub> (11)tors                                                                                            |
| v <sub>20</sub> ' | 87(2.5/0.8)    | H <sub>14</sub> O <sub>13</sub> H <sub>6</sub> (20)bend+H <sub>6</sub> N <sub>2</sub> N <sub>1</sub> (27)bend+O <sub>13</sub> H <sub>6</sub> N <sub>2</sub> C <sub>3</sub> (15)tors                                                                                            |
| v <sub>21</sub> ' | 60(1.4/8.1)    | O <sub>13</sub> H <sub>6</sub> N <sub>2</sub> (25)bend+H <sub>6</sub> N <sub>2</sub> N <sub>1</sub> C <sub>5</sub> (33)tors+C <sub>8</sub> C <sub>3</sub> C <sub>5</sub> N <sub>4</sub> (11)out                                                                                |

---

□m=middle, s= strong, vs= very strong, w=weak, vw=very weak; PED=potential energy distribution, only contributions larger than 10% were given.

**Table S3.** Calculated and experimental electronic transition energy ( $\Delta E$ , in kcal/mol) and oscillator intensity (f) for 4MMT(CH<sub>3</sub>CN), 4MMT(CH<sub>3</sub>OH)<sub>2</sub> and 4MMT(H<sub>2</sub>O)<sub>2</sub> clusters in singlet states at TD-B3LYP-D3(BJ)/6-311++G(d,p), PCM level.

|                            | Orbitals(coefficients) | Electronic transition | Transition Energy(nm)         |            | Oscillator strength(f) |               |
|----------------------------|------------------------|-----------------------|-------------------------------|------------|------------------------|---------------|
|                            |                        |                       | Calc.(a)                      | Expt.      | Calc.                  | Expt.         |
| <b>In CH<sub>3</sub>CN</b> |                        |                       |                               |            |                        |               |
| S <sub>1</sub>             | 40→42(0.66302)         | n→π*                  | 268.3(269 <sup>a</sup> )      |            | 0.0004                 |               |
| S <sub>2</sub>             | <b>41→42(0.68625)</b>  | <b>π→π*</b>           | 245.6(263 <sup>a</sup> )      | <b>255</b> | <b>0.1964</b>          | <b>0.1324</b> |
| S <sub>3</sub>             | 41→43(0.58499)         | π→Ryd <sub>1</sub>    | 239.8(232 <sup>a</sup> )      |            | 0.0559                 |               |
| S <sub>4</sub>             | 41→44(0.68646)         | π→π*                  | 237.4(216 <sup>a</sup> )      | 222        | 0.1383                 |               |
|                            |                        |                       |                               |            |                        |               |
| <b>In CH<sub>3</sub>OH</b> |                        |                       |                               |            |                        |               |
| S <sub>1</sub>             | 47→49(0.67053)         | n→π*                  | 253.9                         |            | 0.0021                 |               |
| S <sub>2</sub>             | <b>48→49(0.68233)</b>  | <b>π→π*</b>           | <b>240.0</b>                  | <b>251</b> | <b>0.2319</b>          | <b>0.1431</b> |
| S <sub>3</sub>             | 48→51(0.65948)         | π→Ryd <sub>1</sub>    | 236.0                         |            | 0.0546                 |               |
| S <sub>4</sub>             | 48→50(0.66678)         | π→π*                  | 233.1                         |            | 0.1078                 |               |
|                            |                        |                       |                               |            |                        |               |
| <b>In H<sub>2</sub>O</b>   |                        |                       |                               |            |                        |               |
| S <sub>1</sub>             | 39→41(0.66857)         | n→π*                  | 253.2(242 <sup>a</sup> )      |            | 0.0012                 |               |
| S <sub>2</sub>             | 40→42(0.51193)         | π→Ryd <sub>1</sub>    | 241.5(253 <sup>a</sup> )      |            | 0.1068                 |               |
| S <sub>3</sub>             | <b>40→41(0.50007)</b>  | <b>π→π*</b>           | <b>238.4(218<sup>a</sup>)</b> | <b>245</b> | <b>0.1843</b>          | <b>0.1032</b> |
| S <sub>4</sub>             | 40→43(0.69426)         | π→π*                  | 232.5(144 <sup>a</sup> )      |            | 0.1162                 |               |
|                            |                        |                       |                               |            |                        |               |

**Table S4.** Calculated and experimental electronic transition energy ( $\Delta E$ , in kcal/mol) and oscillator intensity (f) for 4MMT(CH<sub>3</sub>CN), 4MMT(CH<sub>3</sub>OH)<sub>2</sub> and 4MMT(H<sub>2</sub>O)<sub>2</sub> clusters in triplet states at TD- B3LYP -D3(BJ)/6-311++G(d, p), PCM level.

|                            | Orbitals(coefficients)  | Electronic transition | Transition Energy(nm) |            | Oscillator strength(f) |       |
|----------------------------|-------------------------|-----------------------|-----------------------|------------|------------------------|-------|
|                            |                         |                       | Calc.(a)              | Expt.      | Calc.                  | Expt. |
| <b>In CH<sub>3</sub>CN</b> |                         |                       |                       |            |                        |       |
| T <sub>2</sub>             | 42A→43A(0.66264)        | π→π*                  | 496.6                 |            | 0.0559                 |       |
|                            | 39B→41B(0.74234)        | π→π*                  |                       |            |                        |       |
| T <sub>3</sub>             | <b>42A→43A(0.60196)</b> | <b>π→π*</b>           | <b>457.7</b>          | <b>470</b> | <b>0.0482</b>          |       |
|                            | <b>39B→41B(0.63109)</b> | <b>π→π*</b>           |                       |            |                        |       |
| T <sub>4</sub>             | 38B→41B(0.93748)        | π→π*                  | 384.1                 |            | 0.0266                 |       |
| T <sub>5</sub>             | <b>42A→44A(0.72983)</b> | <b>π→π*</b>           | <b>368.0</b>          | <b>350</b> | <b>0.0266</b>          |       |



42A → 45A(0.60226

$\pi \rightarrow \pi^*$

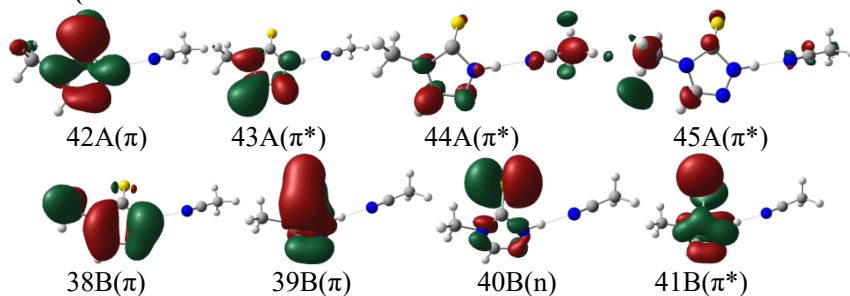

**In CH<sub>3</sub>OH**

|                |                    |                            |        |        |
|----------------|--------------------|----------------------------|--------|--------|
| T <sub>2</sub> | 49A → 50A(0.51168) | $\pi \rightarrow \pi^*$    | 501.19 | 0.0653 |
|                | 46B → 48B(0.81893) | $\pi \rightarrow \pi^*$    |        |        |
| T <sub>3</sub> | 49A → 50A(0.73861) | $\pi \rightarrow \pi^*$    | 459.5  | 470    |
|                | 46B → 48B(0.65542) | $\pi \rightarrow \pi^*$    |        | 0.0314 |
| T <sub>6</sub> | 43B → 48B(0.65542) | $\pi \rightarrow \pi^*$    | 389.34 | 0.0130 |
|                | 44B → 48B(0.65542) | Ryd <sub>1</sub> → $\pi^*$ |        |        |
| T <sub>9</sub> | 49A → 52A(0.65889) |                            | 329.3  | 350    |

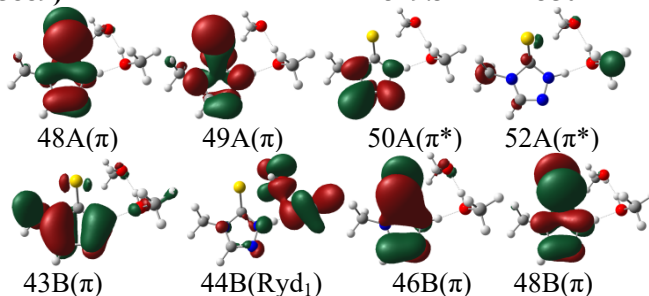

**In H<sub>2</sub>O**

|                |                    |                                    |       |        |
|----------------|--------------------|------------------------------------|-------|--------|
| T <sub>2</sub> | 41A → 42A(0.60086) | $\pi \rightarrow \pi^*$            | 500.4 | 0.0703 |
|                | 38B → 40B(0.82498) | $\pi \rightarrow \pi^*$            |       |        |
| T <sub>3</sub> | 38B → 40B(0.51149) | $\pi \rightarrow \pi^*$            | 457.9 | 0.0337 |
| T <sub>4</sub> | 37B → 40B(0.91099) | $\pi \rightarrow \pi^*$            | 397.8 | 0.0221 |
| T <sub>7</sub> | 41A → 44A(0.95501) | $\pi \rightarrow$ Ryd <sub>1</sub> | 335.0 | 0.0206 |

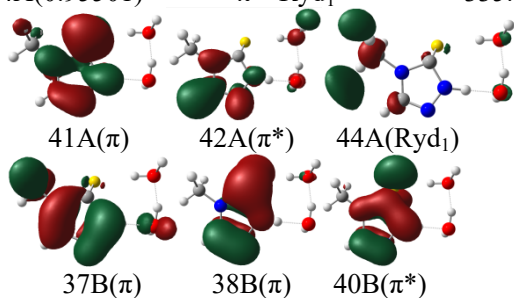

**Table S5.** Optimized bond lengths and angles for different minimum structures ( $S_{2\min}$ ,  $S_{1\min}$ , and  $T_{2\min}$ ), and ISC points( $S_1/T_1$  and  $S_0/T_1$ ) (TD-B3LYP-D3(BJ)/6-311G(d, p) levels with PCM (solvent=acetonitrile) model. (Atom number referred to Figure S1)

|             | $d(S_7-C_3-N_2-N_1)$ | $C_3=S_7$ | $N_1-N_2$ | $N_2-H_6$ | $N_2-C_3$ | $C_3-N_4$ | $N_4-C_5$ | $N_4-H_8$ | $N_1-C_5$ | $C_5-H_9$ |
|-------------|----------------------|-----------|-----------|-----------|-----------|-----------|-----------|-----------|-----------|-----------|
| $S_0$       | 180.0                | 1.688     | 1.367     | 1.008     | 1.353     | 1.374     | 1.371     | 1.457     | 1.300     | 1.077     |
| $S_{2\min}$ | 125.0                | 1.875     | 1.370     | 1.007     | 1.400     | 1.411     | 1.358     | 1.449     | 1.306     | 1.078     |
| $S_{1\min}$ | 125.0                | 1.874     | 1.370     | 1.007     | 1.400     | 1.411     | 1.358     | 1.449     | 1.306     | 1.078     |
| $T_{1\min}$ | 119.4                | 1.759     | 1.357     | 1.010     | 1.443     | 1.446     | 1.340     | 1.449     | 1.319     | 1.079     |
| $S_1/T_1$   | 105.8                | 1.844     | 1.438     | 1.028     | 1.473     | 1.421     | 1.412     | 1.465     | 1.280     | 1.081     |
| $S_0/T_1$   | 165.1                | 1.648     | 1.365     | 1.013     | 1.404     | 1.373     | 1.429     | 1.456     | 1.468     | 1.101     |

**Table S6.** Optimized Cartesian coordinates and Hartree-Fock energies (a.u.) at CASSCF(12e/9o)/cc-pVDZ level.

| State                | HF energy  | Structure  | Cartesian coordinates |            |            |            |
|----------------------|------------|------------|-----------------------|------------|------------|------------|
| S <sub>0</sub> , min | -678.46027 |            | C                     | 0.45490073 | 1.31869935 | 0.03582096 |
|                      |            |            | C                     | -0.2345193 | -0.7924653 | 0.0042314  |
|                      |            |            | C                     | -2.0227182 | 0.98389392 | -0.0094002 |
|                      |            |            | N                     | -0.6544216 | 0.50878365 | 0.0088384  |
|                      |            |            | N                     | 1.47793492 | 0.42052945 | 0.04563403 |
|                      |            |            | N                     | 1.05745911 | -0.897038  | 0.02625257 |
|                      |            |            | S                     | 0.53120189 | 2.96874506 | 0.05217782 |
|                      |            |            | H                     | -0.9062152 | -1.6311936 | -0.0157399 |
|                      |            |            | H                     | 2.44719002 | 0.63772897 | 0.06625092 |
|                      |            |            | H                     | -2.2208185 | 1.58480666 | 0.87527623 |
| S <sub>1</sub> , min | -678.33025 |            | C                     | 0.43662423 | 1.36550339 | 0.06934993 |
|                      |            |            | C                     | -0.2218552 | -0.7469508 | -0.104321  |
|                      |            |            | C                     | -2.0128661 | 0.94391418 | 0.10582193 |
|                      |            |            | N                     | -0.6673314 | 0.55645472 | -0.2721521 |
|                      |            |            | N                     | 1.5409475  | 0.47783534 | 0.02479787 |
|                      |            |            | N                     | 1.04390338 | -0.8608563 | 0.085128   |
|                      |            |            | S                     | 0.66315487 | 2.91920734 | -0.8246342 |
|                      |            |            | H                     | -0.885243  | -1.5916753 | -0.1819305 |
|                      |            |            | H                     | 2.26130915 | 0.61374561 | 0.70325371 |
|                      |            |            | H                     | -2.1285983 | 1.03430148 | 1.18938889 |
| H                    | -2.2628298 | 1.89848109 | -0.3538083            |            |            |            |
| H                    | -2.714508  | 0.19994029 | -0.2681463            |            |            |            |

|               |            |            |                                                                                                                                                                                                                                                                                                                                                                                                                                                                                                                                                                                                                                                                                                                                                                                                                                                                                                                                                                                                        |   |            |            |            |   |            |            |            |   |            |            |            |   |            |            |            |   |            |            |            |   |            |            |            |   |            |            |            |   |            |            |            |   |            |            |            |   |            |            |            |   |            |            |            |   |            |            |            |
|---------------|------------|------------|--------------------------------------------------------------------------------------------------------------------------------------------------------------------------------------------------------------------------------------------------------------------------------------------------------------------------------------------------------------------------------------------------------------------------------------------------------------------------------------------------------------------------------------------------------------------------------------------------------------------------------------------------------------------------------------------------------------------------------------------------------------------------------------------------------------------------------------------------------------------------------------------------------------------------------------------------------------------------------------------------------|---|------------|------------|------------|---|------------|------------|------------|---|------------|------------|------------|---|------------|------------|------------|---|------------|------------|------------|---|------------|------------|------------|---|------------|------------|------------|---|------------|------------|------------|---|------------|------------|------------|---|------------|------------|------------|---|------------|------------|------------|---|------------|------------|------------|
| $S_{2, \min}$ | -678.30277 |            | <table border="1"> <tbody> <tr><td>C</td><td>0.44911543</td><td>1.26841398</td><td>0.10381955</td></tr> <tr><td>C</td><td>-0.2763262</td><td>-0.7965428</td><td>-0.2710408</td></tr> <tr><td>C</td><td>-2.0261407</td><td>0.97934322</td><td>-0.0409605</td></tr> <tr><td>N</td><td>-0.6728872</td><td>0.50234122</td><td>0.12072973</td></tr> <tr><td>N</td><td>1.4709932</td><td>0.43614435</td><td>-0.0207996</td></tr> <tr><td>N</td><td>1.11959661</td><td>-0.8906101</td><td>-0.1297813</td></tr> <tr><td>S</td><td>0.57730982</td><td>2.97129558</td><td>0.52177361</td></tr> <tr><td>H</td><td>-0.8890154</td><td>-1.6242801</td><td>0.06602354</td></tr> <tr><td>H</td><td>2.43336676</td><td>0.68363335</td><td>0.04458994</td></tr> <tr><td>H</td><td>-2.1455796</td><td>1.93487329</td><td>0.46391402</td></tr> <tr><td>H</td><td>-2.2844743</td><td>1.08867498</td><td>-1.0966267</td></tr> <tr><td>H</td><td>-2.703251</td><td>0.25661413</td><td>0.41110651</td></tr> </tbody> </table> | C | 0.44911543 | 1.26841398 | 0.10381955 | C | -0.2763262 | -0.7965428 | -0.2710408 | C | -2.0261407 | 0.97934322 | -0.0409605 | N | -0.6728872 | 0.50234122 | 0.12072973 | N | 1.4709932  | 0.43614435 | -0.0207996 | N | 1.11959661 | -0.8906101 | -0.1297813 | S | 0.57730982 | 2.97129558 | 0.52177361 | H | -0.8890154 | -1.6242801 | 0.06602354 | H | 2.43336676 | 0.68363335 | 0.04458994 | H | -2.1455796 | 1.93487329 | 0.46391402 | H | -2.2844743 | 1.08867498 | -1.0966267 | H | -2.703251  | 0.25661413 | 0.41110651 |
| C             | 0.44911543 | 1.26841398 | 0.10381955                                                                                                                                                                                                                                                                                                                                                                                                                                                                                                                                                                                                                                                                                                                                                                                                                                                                                                                                                                                             |   |            |            |            |   |            |            |            |   |            |            |            |   |            |            |            |   |            |            |            |   |            |            |            |   |            |            |            |   |            |            |            |   |            |            |            |   |            |            |            |   |            |            |            |   |            |            |            |
| C             | -0.2763262 | -0.7965428 | -0.2710408                                                                                                                                                                                                                                                                                                                                                                                                                                                                                                                                                                                                                                                                                                                                                                                                                                                                                                                                                                                             |   |            |            |            |   |            |            |            |   |            |            |            |   |            |            |            |   |            |            |            |   |            |            |            |   |            |            |            |   |            |            |            |   |            |            |            |   |            |            |            |   |            |            |            |   |            |            |            |
| C             | -2.0261407 | 0.97934322 | -0.0409605                                                                                                                                                                                                                                                                                                                                                                                                                                                                                                                                                                                                                                                                                                                                                                                                                                                                                                                                                                                             |   |            |            |            |   |            |            |            |   |            |            |            |   |            |            |            |   |            |            |            |   |            |            |            |   |            |            |            |   |            |            |            |   |            |            |            |   |            |            |            |   |            |            |            |   |            |            |            |
| N             | -0.6728872 | 0.50234122 | 0.12072973                                                                                                                                                                                                                                                                                                                                                                                                                                                                                                                                                                                                                                                                                                                                                                                                                                                                                                                                                                                             |   |            |            |            |   |            |            |            |   |            |            |            |   |            |            |            |   |            |            |            |   |            |            |            |   |            |            |            |   |            |            |            |   |            |            |            |   |            |            |            |   |            |            |            |   |            |            |            |
| N             | 1.4709932  | 0.43614435 | -0.0207996                                                                                                                                                                                                                                                                                                                                                                                                                                                                                                                                                                                                                                                                                                                                                                                                                                                                                                                                                                                             |   |            |            |            |   |            |            |            |   |            |            |            |   |            |            |            |   |            |            |            |   |            |            |            |   |            |            |            |   |            |            |            |   |            |            |            |   |            |            |            |   |            |            |            |   |            |            |            |
| N             | 1.11959661 | -0.8906101 | -0.1297813                                                                                                                                                                                                                                                                                                                                                                                                                                                                                                                                                                                                                                                                                                                                                                                                                                                                                                                                                                                             |   |            |            |            |   |            |            |            |   |            |            |            |   |            |            |            |   |            |            |            |   |            |            |            |   |            |            |            |   |            |            |            |   |            |            |            |   |            |            |            |   |            |            |            |   |            |            |            |
| S             | 0.57730982 | 2.97129558 | 0.52177361                                                                                                                                                                                                                                                                                                                                                                                                                                                                                                                                                                                                                                                                                                                                                                                                                                                                                                                                                                                             |   |            |            |            |   |            |            |            |   |            |            |            |   |            |            |            |   |            |            |            |   |            |            |            |   |            |            |            |   |            |            |            |   |            |            |            |   |            |            |            |   |            |            |            |   |            |            |            |
| H             | -0.8890154 | -1.6242801 | 0.06602354                                                                                                                                                                                                                                                                                                                                                                                                                                                                                                                                                                                                                                                                                                                                                                                                                                                                                                                                                                                             |   |            |            |            |   |            |            |            |   |            |            |            |   |            |            |            |   |            |            |            |   |            |            |            |   |            |            |            |   |            |            |            |   |            |            |            |   |            |            |            |   |            |            |            |   |            |            |            |
| H             | 2.43336676 | 0.68363335 | 0.04458994                                                                                                                                                                                                                                                                                                                                                                                                                                                                                                                                                                                                                                                                                                                                                                                                                                                                                                                                                                                             |   |            |            |            |   |            |            |            |   |            |            |            |   |            |            |            |   |            |            |            |   |            |            |            |   |            |            |            |   |            |            |            |   |            |            |            |   |            |            |            |   |            |            |            |   |            |            |            |
| H             | -2.1455796 | 1.93487329 | 0.46391402                                                                                                                                                                                                                                                                                                                                                                                                                                                                                                                                                                                                                                                                                                                                                                                                                                                                                                                                                                                             |   |            |            |            |   |            |            |            |   |            |            |            |   |            |            |            |   |            |            |            |   |            |            |            |   |            |            |            |   |            |            |            |   |            |            |            |   |            |            |            |   |            |            |            |   |            |            |            |
| H             | -2.2844743 | 1.08867498 | -1.0966267                                                                                                                                                                                                                                                                                                                                                                                                                                                                                                                                                                                                                                                                                                                                                                                                                                                                                                                                                                                             |   |            |            |            |   |            |            |            |   |            |            |            |   |            |            |            |   |            |            |            |   |            |            |            |   |            |            |            |   |            |            |            |   |            |            |            |   |            |            |            |   |            |            |            |   |            |            |            |
| H             | -2.703251  | 0.25661413 | 0.41110651                                                                                                                                                                                                                                                                                                                                                                                                                                                                                                                                                                                                                                                                                                                                                                                                                                                                                                                                                                                             |   |            |            |            |   |            |            |            |   |            |            |            |   |            |            |            |   |            |            |            |   |            |            |            |   |            |            |            |   |            |            |            |   |            |            |            |   |            |            |            |   |            |            |            |   |            |            |            |
| $T_{1, \min}$ | -678.34883 |            | <table border="1"> <tbody> <tr><td>C</td><td>0.43498552</td><td>1.36565477</td><td>0.17526186</td></tr> <tr><td>C</td><td>-0.2246557</td><td>-0.7506409</td><td>-0.0670139</td></tr> <tr><td>C</td><td>-2.0346869</td><td>0.95676349</td><td>0.0954269</td></tr> <tr><td>N</td><td>-0.6662595</td><td>0.54484496</td><td>-0.1199996</td></tr> <tr><td>N</td><td>1.51140897</td><td>0.46902312</td><td>0.0497773</td></tr> <tr><td>N</td><td>1.0575688</td><td>-0.8608862</td><td>0.04749891</td></tr> <tr><td>S</td><td>0.660073</td><td>2.87409471</td><td>-0.79876</td></tr> <tr><td>H</td><td>-0.884069</td><td>-1.5957789</td><td>-0.1647695</td></tr> <tr><td>H</td><td>2.36824395</td><td>0.61799224</td><td>0.53535443</td></tr> <tr><td>H</td><td>-2.2505443</td><td>1.09553107</td><td>1.15720857</td></tr> <tr><td>H</td><td>-2.2154949</td><td>1.893478</td><td>-0.4273543</td></tr> <tr><td>H</td><td>-2.7038626</td><td>0.19982455</td><td>-0.3098826</td></tr> </tbody> </table>         | C | 0.43498552 | 1.36565477 | 0.17526186 | C | -0.2246557 | -0.7506409 | -0.0670139 | C | -2.0346869 | 0.95676349 | 0.0954269  | N | -0.6662595 | 0.54484496 | -0.1199996 | N | 1.51140897 | 0.46902312 | 0.0497773  | N | 1.0575688  | -0.8608862 | 0.04749891 | S | 0.660073   | 2.87409471 | -0.79876   | H | -0.884069  | -1.5957789 | -0.1647695 | H | 2.36824395 | 0.61799224 | 0.53535443 | H | -2.2505443 | 1.09553107 | 1.15720857 | H | -2.2154949 | 1.893478   | -0.4273543 | H | -2.7038626 | 0.19982455 | -0.3098826 |
| C             | 0.43498552 | 1.36565477 | 0.17526186                                                                                                                                                                                                                                                                                                                                                                                                                                                                                                                                                                                                                                                                                                                                                                                                                                                                                                                                                                                             |   |            |            |            |   |            |            |            |   |            |            |            |   |            |            |            |   |            |            |            |   |            |            |            |   |            |            |            |   |            |            |            |   |            |            |            |   |            |            |            |   |            |            |            |   |            |            |            |
| C             | -0.2246557 | -0.7506409 | -0.0670139                                                                                                                                                                                                                                                                                                                                                                                                                                                                                                                                                                                                                                                                                                                                                                                                                                                                                                                                                                                             |   |            |            |            |   |            |            |            |   |            |            |            |   |            |            |            |   |            |            |            |   |            |            |            |   |            |            |            |   |            |            |            |   |            |            |            |   |            |            |            |   |            |            |            |   |            |            |            |
| C             | -2.0346869 | 0.95676349 | 0.0954269                                                                                                                                                                                                                                                                                                                                                                                                                                                                                                                                                                                                                                                                                                                                                                                                                                                                                                                                                                                              |   |            |            |            |   |            |            |            |   |            |            |            |   |            |            |            |   |            |            |            |   |            |            |            |   |            |            |            |   |            |            |            |   |            |            |            |   |            |            |            |   |            |            |            |   |            |            |            |
| N             | -0.6662595 | 0.54484496 | -0.1199996                                                                                                                                                                                                                                                                                                                                                                                                                                                                                                                                                                                                                                                                                                                                                                                                                                                                                                                                                                                             |   |            |            |            |   |            |            |            |   |            |            |            |   |            |            |            |   |            |            |            |   |            |            |            |   |            |            |            |   |            |            |            |   |            |            |            |   |            |            |            |   |            |            |            |   |            |            |            |
| N             | 1.51140897 | 0.46902312 | 0.0497773                                                                                                                                                                                                                                                                                                                                                                                                                                                                                                                                                                                                                                                                                                                                                                                                                                                                                                                                                                                              |   |            |            |            |   |            |            |            |   |            |            |            |   |            |            |            |   |            |            |            |   |            |            |            |   |            |            |            |   |            |            |            |   |            |            |            |   |            |            |            |   |            |            |            |   |            |            |            |
| N             | 1.0575688  | -0.8608862 | 0.04749891                                                                                                                                                                                                                                                                                                                                                                                                                                                                                                                                                                                                                                                                                                                                                                                                                                                                                                                                                                                             |   |            |            |            |   |            |            |            |   |            |            |            |   |            |            |            |   |            |            |            |   |            |            |            |   |            |            |            |   |            |            |            |   |            |            |            |   |            |            |            |   |            |            |            |   |            |            |            |
| S             | 0.660073   | 2.87409471 | -0.79876                                                                                                                                                                                                                                                                                                                                                                                                                                                                                                                                                                                                                                                                                                                                                                                                                                                                                                                                                                                               |   |            |            |            |   |            |            |            |   |            |            |            |   |            |            |            |   |            |            |            |   |            |            |            |   |            |            |            |   |            |            |            |   |            |            |            |   |            |            |            |   |            |            |            |   |            |            |            |
| H             | -0.884069  | -1.5957789 | -0.1647695                                                                                                                                                                                                                                                                                                                                                                                                                                                                                                                                                                                                                                                                                                                                                                                                                                                                                                                                                                                             |   |            |            |            |   |            |            |            |   |            |            |            |   |            |            |            |   |            |            |            |   |            |            |            |   |            |            |            |   |            |            |            |   |            |            |            |   |            |            |            |   |            |            |            |   |            |            |            |
| H             | 2.36824395 | 0.61799224 | 0.53535443                                                                                                                                                                                                                                                                                                                                                                                                                                                                                                                                                                                                                                                                                                                                                                                                                                                                                                                                                                                             |   |            |            |            |   |            |            |            |   |            |            |            |   |            |            |            |   |            |            |            |   |            |            |            |   |            |            |            |   |            |            |            |   |            |            |            |   |            |            |            |   |            |            |            |   |            |            |            |
| H             | -2.2505443 | 1.09553107 | 1.15720857                                                                                                                                                                                                                                                                                                                                                                                                                                                                                                                                                                                                                                                                                                                                                                                                                                                                                                                                                                                             |   |            |            |            |   |            |            |            |   |            |            |            |   |            |            |            |   |            |            |            |   |            |            |            |   |            |            |            |   |            |            |            |   |            |            |            |   |            |            |            |   |            |            |            |   |            |            |            |
| H             | -2.2154949 | 1.893478   | -0.4273543                                                                                                                                                                                                                                                                                                                                                                                                                                                                                                                                                                                                                                                                                                                                                                                                                                                                                                                                                                                             |   |            |            |            |   |            |            |            |   |            |            |            |   |            |            |            |   |            |            |            |   |            |            |            |   |            |            |            |   |            |            |            |   |            |            |            |   |            |            |            |   |            |            |            |   |            |            |            |
| H             | -2.7038626 | 0.19982455 | -0.3098826                                                                                                                                                                                                                                                                                                                                                                                                                                                                                                                                                                                                                                                                                                                                                                                                                                                                                                                                                                                             |   |            |            |            |   |            |            |            |   |            |            |            |   |            |            |            |   |            |            |            |   |            |            |            |   |            |            |            |   |            |            |            |   |            |            |            |   |            |            |            |   |            |            |            |   |            |            |            |
| $T_{2, \min}$ | -678.33552 |            | <table border="1"> <tbody> <tr><td>C</td><td>0.44156691</td><td>1.36698283</td><td>0.07095964</td></tr> <tr><td>C</td><td>-0.2199391</td><td>-0.7476218</td><td>-0.1051957</td></tr> <tr><td>C</td><td>-2.0088144</td><td>0.94689677</td><td>0.10827326</td></tr> <tr><td>N</td><td>-0.6614051</td><td>0.55825329</td><td>-0.2648092</td></tr> <tr><td>N</td><td>1.54110024</td><td>0.47298294</td><td>0.03794874</td></tr> <tr><td>N</td><td>1.04414752</td><td>-0.8621262</td><td>0.09120168</td></tr> </tbody> </table>                                                                                                                                                                                                                                                                                                                                                                                                                                                                             | C | 0.44156691 | 1.36698283 | 0.07095964 | C | -0.2199391 | -0.7476218 | -0.1051957 | C | -2.0088144 | 0.94689677 | 0.10827326 | N | -0.6614051 | 0.55825329 | -0.2648092 | N | 1.54110024 | 0.47298294 | 0.03794874 | N | 1.04414752 | -0.8621262 | 0.09120168 |   |            |            |            |   |            |            |            |   |            |            |            |   |            |            |            |   |            |            |            |   |            |            |            |
| C             | 0.44156691 | 1.36698283 | 0.07095964                                                                                                                                                                                                                                                                                                                                                                                                                                                                                                                                                                                                                                                                                                                                                                                                                                                                                                                                                                                             |   |            |            |            |   |            |            |            |   |            |            |            |   |            |            |            |   |            |            |            |   |            |            |            |   |            |            |            |   |            |            |            |   |            |            |            |   |            |            |            |   |            |            |            |   |            |            |            |
| C             | -0.2199391 | -0.7476218 | -0.1051957                                                                                                                                                                                                                                                                                                                                                                                                                                                                                                                                                                                                                                                                                                                                                                                                                                                                                                                                                                                             |   |            |            |            |   |            |            |            |   |            |            |            |   |            |            |            |   |            |            |            |   |            |            |            |   |            |            |            |   |            |            |            |   |            |            |            |   |            |            |            |   |            |            |            |   |            |            |            |
| C             | -2.0088144 | 0.94689677 | 0.10827326                                                                                                                                                                                                                                                                                                                                                                                                                                                                                                                                                                                                                                                                                                                                                                                                                                                                                                                                                                                             |   |            |            |            |   |            |            |            |   |            |            |            |   |            |            |            |   |            |            |            |   |            |            |            |   |            |            |            |   |            |            |            |   |            |            |            |   |            |            |            |   |            |            |            |   |            |            |            |
| N             | -0.6614051 | 0.55825329 | -0.2648092                                                                                                                                                                                                                                                                                                                                                                                                                                                                                                                                                                                                                                                                                                                                                                                                                                                                                                                                                                                             |   |            |            |            |   |            |            |            |   |            |            |            |   |            |            |            |   |            |            |            |   |            |            |            |   |            |            |            |   |            |            |            |   |            |            |            |   |            |            |            |   |            |            |            |   |            |            |            |
| N             | 1.54110024 | 0.47298294 | 0.03794874                                                                                                                                                                                                                                                                                                                                                                                                                                                                                                                                                                                                                                                                                                                                                                                                                                                                                                                                                                                             |   |            |            |            |   |            |            |            |   |            |            |            |   |            |            |            |   |            |            |            |   |            |            |            |   |            |            |            |   |            |            |            |   |            |            |            |   |            |            |            |   |            |            |            |   |            |            |            |
| N             | 1.04414752 | -0.8621262 | 0.09120168                                                                                                                                                                                                                                                                                                                                                                                                                                                                                                                                                                                                                                                                                                                                                                                                                                                                                                                                                                                             |   |            |            |            |   |            |            |            |   |            |            |            |   |            |            |            |   |            |            |            |   |            |            |            |   |            |            |            |   |            |            |            |   |            |            |            |   |            |            |            |   |            |            |            |   |            |            |            |

|                                |            |                                                                                     |   |            |            |            |
|--------------------------------|------------|-------------------------------------------------------------------------------------|---|------------|------------|------------|
|                                |            |                                                                                     | S | 0.62615232 | 2.91635315 | -0.8558438 |
|                                |            |                                                                                     | H | -0.884069  | -1.5957789 | -0.1647695 |
|                                |            |                                                                                     | H | 2.36824395 | 0.61799224 | 0.53535443 |
|                                |            |                                                                                     | H | -2.2505443 | 1.09553107 | 1.15720857 |
|                                |            |                                                                                     | H | -2.2154949 | 1.893478   | -0.4273543 |
|                                |            |                                                                                     | H | -2.7038626 | 0.19982455 | -0.3098826 |
| S <sub>1</sub> /S <sub>2</sub> | -678.31869 | 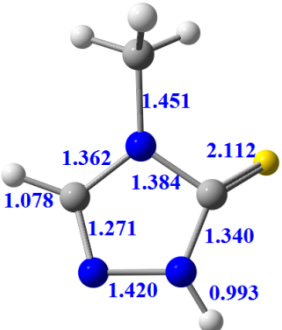  | C | 0.45168082 | 1.3292891  | 0.32321865 |
|                                | -678.32170 |                                                                                     | C | -0.2030692 | -0.7449139 | -0.1141762 |
|                                |            |                                                                                     | C | -2.0301862 | 0.95525847 | 0.09706694 |
|                                |            |                                                                                     | N | -0.6431788 | 0.53700411 | 0.02478555 |
|                                |            |                                                                                     | N | 1.44496342 | 0.43464966 | 0.42001008 |
|                                |            |                                                                                     | N | 1.04568202 | -0.8835734 | 0.0756995  |
|                                |            |                                                                                     | S | 0.59224607 | 2.92033234 | -1.0588398 |
|                                |            |                                                                                     | H | -0.861399  | -1.5614708 | -0.3608926 |
|                                |            |                                                                                     | H | 2.41696307 | 0.63481342 | 0.44300777 |
|                                |            |                                                                                     | H | -2.3909901 | 0.94538573 | 1.1262346  |
|                                |            |                                                                                     | H | -2.1308944 | 1.96130019 | -0.2998493 |
|                                |            |                                                                                     | H | -2.6391104 | 0.28182609 | -0.5035173 |
| S <sub>2</sub> /T <sub>2</sub> | -678.32362 |  | C | 0.43722014 | 1.34810603 | 0.30676611 |
|                                | -678.3299  |                                                                                     | C | -0.1958307 | -0.7411021 | -0.1348184 |
|                                |            |                                                                                     | C | -2.0369535 | 0.95662896 | 0.10717846 |
|                                |            |                                                                                     | N | -0.669823  | 0.50814568 | 0.1627594  |
|                                |            |                                                                                     | N | 1.54171128 | 0.52526558 | -0.0219544 |
|                                |            |                                                                                     | N | 1.08408887 | -0.8301099 | -0.213114  |
|                                |            |                                                                                     | S | 0.61357386 | 2.88020536 | -0.643013  |
|                                |            |                                                                                     | H | -0.8515648 | -1.5857819 | -0.2653749 |
|                                |            |                                                                                     | H | 2.3243388  | 0.54875855 | 0.59711229 |
|                                |            |                                                                                     | H | -2.3159988 | 1.46078795 | 1.03285272 |
|                                |            |                                                                                     | H | -2.1876151 | 1.64248139 | -0.730317  |

|                                |            |                                                                                     |   |            |            |            |
|--------------------------------|------------|-------------------------------------------------------------------------------------|---|------------|------------|------------|
|                                |            |                                                                                     | H | -2.6904397 | 0.09651539 | -0.0253294 |
| S <sub>1</sub> /T <sub>2</sub> | -678.3299  | 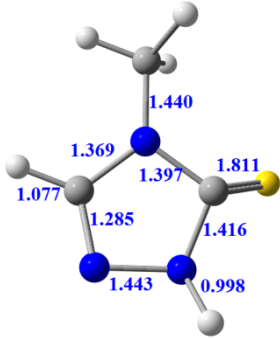  | C | 0.43722014 | 1.34810603 | 0.30676611 |
|                                | -678.32209 |                                                                                     | C | -0.1958307 | -0.7411021 | -0.1348184 |
| T <sub>1</sub> /T <sub>2</sub> | -678.33409 |  | C | -2.0369535 | 0.95662896 | 0.10717846 |
|                                |            |                                                                                     | N | -0.669823  | 0.50814568 | 0.1627594  |
|                                |            |                                                                                     | N | 1.54171128 | 0.52526558 | -0.0219544 |
|                                |            |                                                                                     | N | 1.08408887 | -0.8301099 | -0.213114  |
|                                |            |                                                                                     | S | 0.61357386 | 2.88020536 | -0.643013  |
|                                |            |                                                                                     | H | -0.8515648 | -1.5857819 | -0.2653749 |
|                                |            |                                                                                     | H | 2.3243388  | 0.54875855 | 0.59711229 |
|                                |            |                                                                                     | H | -2.3159988 | 1.46078795 | 1.03285272 |
|                                |            |                                                                                     | H | -2.1876151 | 1.64248139 | -0.730317  |
|                                |            |                                                                                     | H | -2.6904397 | 0.09651539 | -0.0253294 |
|                                | -678.33473 |                                                                                     | C | 0.43777585 | 1.38569347 | -0.0329063 |
|                                |            |                                                                                     | C | -0.2184649 | -0.7313767 | -0.1715402 |
|                                |            |                                                                                     | C | -1.9858701 | 0.93346052 | 0.14918433 |
|                                |            |                                                                                     | N | -0.6746504 | 0.57545964 | -0.3758382 |
|                                |            |                                                                                     | N | 1.54996351 | 0.49754473 | 0.08132909 |
|                                |            |                                                                                     | N | 1.02603108 | -0.8458376 | 0.10392862 |
|                                |            |                                                                                     | S | 0.69117747 | 2.8691731  | -1.0135847 |
|                                |            |                                                                                     | H | -0.8751793 | -1.5782408 | -0.281495  |
|                                |            |                                                                                     | H | 2.10561209 | 0.62543782 | 0.90367172 |
|                                |            |                                                                                     | H | -2.0041938 | 0.96523266 | 1.24227163 |
|                                |            |                                                                                     | H | -2.2832535 | 1.90850943 | -0.2320972 |
|                                |            |                                                                                     | H | -2.7162408 | 0.20484464 | -0.2001759 |

**Table S7.** Optimized Cartesian coordinates and Hartree-Fock energies (a.u.) at (TD-)B3LYP-(D3)BJ/6-311G(d, p) level with PCM acetonitrile model.

| State             | H-F energy    | Structure                                                                                                    | Cartesian coordinates                                                                                                                                                                                                                                                                                                                                                                                                                                                                    |
|-------------------|---------------|--------------------------------------------------------------------------------------------------------------|------------------------------------------------------------------------------------------------------------------------------------------------------------------------------------------------------------------------------------------------------------------------------------------------------------------------------------------------------------------------------------------------------------------------------------------------------------------------------------------|
| S <sub>0</sub>    | -679.89932840 | 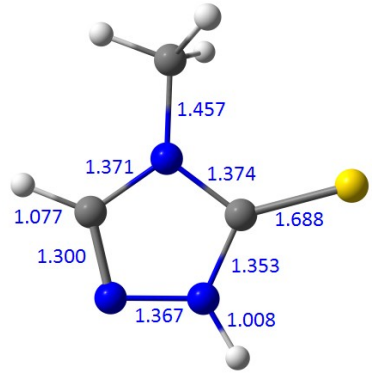 <p>d(S-C-N-N): 180.0</p>  | N -1.77609500 -1.15252300 0.00000400<br>N -0.43844100 -1.43621800 0.00001300<br>C 0.35302500 -0.33916000 -0.00000200<br>N -0.55435900 0.69313500 -0.00002800<br>C -1.81204000 0.14707500 -0.00004400<br>H -0.11801800 -2.39236900 0.00004100<br>S 2.03857200 -0.24692200 0.00003200<br>C -0.21071600 2.10863200 -0.00001400<br>H -2.71271700 0.73817400 -0.00006700<br>H 0.37379200 2.34491500 -0.88861000<br>H -1.13277700 2.68493000 -0.00036400<br>H 0.37321500 2.34506700 0.88892500 |
| S <sub>1min</sub> | -679.76005806 |  <p>d(S-C-N-N): 125.0</p> | N 1.38008500 -1.46201600 -0.23532500<br>N 0.13128300 -1.44340300 0.32745600<br>C -0.35113800 -0.15927600 0.60767900<br>N 0.70904400 0.62582900 0.10736000<br>C 1.68857500 -0.19805900 -0.34696100<br>H -0.30141500 -2.30942300 0.60322300<br>S -2.01254900 0.03012800 -0.23869100<br>C 0.70336200 2.07448200 0.11308000<br>H 2.62112300 0.16006700 -0.75291000                                                                                                                           |

|                   |               |                                                                                                              |   |             |             |             |
|-------------------|---------------|--------------------------------------------------------------------------------------------------------------|---|-------------|-------------|-------------|
|                   |               |                                                                                                              | H | 0.70082400  | 2.45047300  | 1.13765800  |
|                   |               |                                                                                                              | H | 1.58590600  | 2.43895000  | -0.40827600 |
|                   |               |                                                                                                              | H | -0.19332400 | 2.43212600  | -0.39987100 |
| S <sub>2min</sub> | -679.74743943 | 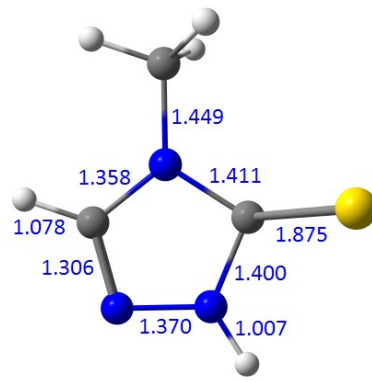 <p>d(S-C-N-N): 125.0</p>  | N | 1.37925000  | -1.46257700 | -0.23545800 |
|                   |               |                                                                                                              | N | 0.13054400  | -1.44342200 | 0.32774400  |
|                   |               |                                                                                                              | C | -0.35095900 | -0.15898200 | 0.60808200  |
|                   |               |                                                                                                              | N | 0.70949400  | 0.62564000  | 0.10750300  |
|                   |               |                                                                                                              | C | 1.68828300  | -0.19878500 | -0.34745800 |
|                   |               |                                                                                                              | H | -0.30202000 | -2.30920100 | 0.60449100  |
|                   |               |                                                                                                              | S | -2.01254700 | 0.03077900  | -0.23887400 |
|                   |               |                                                                                                              | C | 0.70434700  | 2.07431900  | 0.11319500  |
|                   |               |                                                                                                              | H | 2.62088300  | 0.15884600  | -0.75374700 |
|                   |               |                                                                                                              | H | 0.70180100  | 2.45029300  | 1.13776800  |
|                   |               |                                                                                                              | H | 1.58711700  | 2.43846700  | -0.40800900 |
|                   |               |                                                                                                              | H | -0.19206500 | 2.43232700  | -0.39995100 |
| T <sub>1min</sub> | -679.78442281 |  <p>d(S-C-N-N): 119.4</p> | N | 1.37554600  | -1.46018400 | -0.22836400 |
|                   |               |                                                                                                              | N | 0.17296500  | -1.47869000 | 0.40064800  |
|                   |               |                                                                                                              | C | -0.41800800 | -0.17041800 | 0.55020900  |
|                   |               |                                                                                                              | N | 0.68694000  | 0.63366000  | 0.07885300  |
|                   |               |                                                                                                              | C | 1.66166100  | -0.17863800 | -0.35341700 |
|                   |               |                                                                                                              | H | -0.37547800 | -2.32598200 | 0.35958700  |
|                   |               |                                                                                                              | S | -1.97813800 | 0.03477200  | -0.23687800 |
|                   |               |                                                                                                              | C | 0.70310000  | 2.08112000  | 0.13654900  |
|                   |               |                                                                                                              | H | 2.58737100  | 0.17949500  | -0.77639500 |
|                   |               |                                                                                                              | H | 0.72363300  | 2.41339200  | 1.17681000  |



|                                |               |                                                                                                              |                                                                                                                                                                                                                                                                                                                                                                                                                                                                                    |
|--------------------------------|---------------|--------------------------------------------------------------------------------------------------------------|------------------------------------------------------------------------------------------------------------------------------------------------------------------------------------------------------------------------------------------------------------------------------------------------------------------------------------------------------------------------------------------------------------------------------------------------------------------------------------|
|                                |               |                                                                                                              | H 1.58303000 2.45115100 -0.38555500                                                                                                                                                                                                                                                                                                                                                                                                                                                |
|                                |               |                                                                                                              | H -0.19700800 2.46970900 -0.34241400                                                                                                                                                                                                                                                                                                                                                                                                                                               |
| T <sub>2min</sub>              | -679.7828686  | 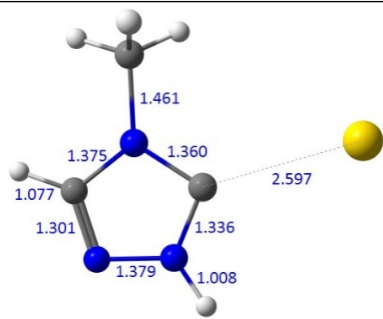 <p>d(S-C-N-N): 137.1</p>  | N 2.00967700 -1.08547300 -0.23717000<br>N 0.75883900 -1.42224100 0.23563600<br>C -0.05638200 -0.38831700 0.46279600<br>N 0.71882100 0.67240000 0.11091500<br>C 1.94666600 0.21201200 -0.30386500<br>H 0.54130800 -2.39577600 0.38210500<br>S -2.57484500 -0.26016100 -0.15778300<br>C 0.27536800 2.06409400 0.11579900<br>H 2.74877600 0.85212600 -0.63163400<br>H -0.30121900 2.25029500 1.01897900<br>H 1.14671900 2.71574200 0.10124200<br>H -0.34334600 2.26065900 -0.76021900 |
| S <sub>0</sub> /T <sub>1</sub> | -679.76186289 |  <p>d(S-C-N-N): 165.1</p> | N -1.81202200 -1.16914000 -0.33201100<br>N -0.54312100 -1.42461400 0.10054500<br>C 0.27219100 -0.29600100 -0.08177600<br>N -0.60106100 0.74082200 -0.30029300<br>C -1.88752000 0.24095700 0.06919800<br>H -0.16014900 -2.35356300 -0.02999400<br>S 1.91916600 -0.28378700 -0.01935400<br>C -0.23202500 2.14153100 -0.15440000<br>H -2.15247800 0.41982100 1.12318100<br>H 0.74561100 2.30027300 -0.60418700<br>H -0.97230100 2.74804600 -0.67234000                                |

|                                |               |                                                                                                              |             |             |             |             |
|--------------------------------|---------------|--------------------------------------------------------------------------------------------------------------|-------------|-------------|-------------|-------------|
|                                |               |                                                                                                              | H           | -0.19528900 | 2.42948000  | 0.90131800  |
| S <sub>1</sub> /T <sub>1</sub> | -679.74785189 | 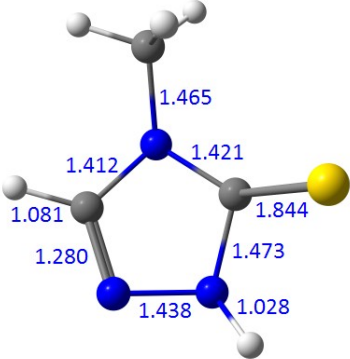 <p>d(S-C-N-N): 105.8</p>  | N           | 1.24163900  | -1.41817300 | -0.38780200 |
|                                |               |                                                                                                              | N           | 0.21441100  | -1.55081400 | 0.61034900  |
|                                |               |                                                                                                              | C           | -0.19558800 | -0.14243900 | 0.74667500  |
|                                |               |                                                                                                              | N           | 0.95708400  | 0.65832100  | 0.52658600  |
|                                |               |                                                                                                              | C           | 1.62722400  | -0.19816100 | -0.37441600 |
|                                |               |                                                                                                              | H           | -0.53535100 | -2.12747400 | 0.20821400  |
|                                |               |                                                                                                              | S           | -1.82799200 | 0.00082300  | -0.09878900 |
|                                |               |                                                                                                              | C           | 0.71715000  | 2.04822500  | 0.13038000  |
|                                |               |                                                                                                              | H           | 2.47405800  | 0.16300600  | -0.94164500 |
|                                |               |                                                                                                              | H           | 0.40772900  | 2.62935900  | 0.99859000  |
|                                |               |                                                                                                              | H           | 1.64472000  | 2.46861700  | -0.25589600 |
| H                              | -0.06364400   | 2.10993300                                                                                                   | -0.64564000 |             |             |             |
| T <sub>1</sub> -TS             | -679.72096069 |  <p>d(S-C-N-N): 117.4</p> | N           | 0.47224200  | -1.83557800 | -0.20322000 |
|                                |               |                                                                                                              | N           | -0.55804400 | -1.32448800 | 0.50625100  |
|                                |               |                                                                                                              | C           | -0.33908800 | 0.14759000  | 0.62969900  |
|                                |               |                                                                                                              | N           | 0.97968200  | 0.32423700  | 0.12185400  |
|                                |               |                                                                                                              | C           | 1.35786400  | -0.86852600 | -0.38695600 |
|                                |               |                                                                                                              | S           | -1.78860000 | 0.67634700  | -0.25134200 |
|                                |               |                                                                                                              | C           | 1.69128600  | 1.58718000  | 0.06632400  |
|                                |               |                                                                                                              | H           | 2.29788800  | -1.01082500 | -0.90005100 |
|                                |               |                                                                                                              | H           | 1.72754000  | 2.03010800  | 1.06267100  |
|                                |               |                                                                                                              | H           | 2.70501600  | 1.40882300  | -0.28737300 |
|                                |               |                                                                                                              | H           | 1.18910900  | 2.27837300  | -0.61497100 |
| H                              | -1.81948200   | -0.87469700                                                                                                  | -0.06740600 |             |             |             |

|                     |               |                                                                                                                                         |   |             |             |             |
|---------------------|---------------|-----------------------------------------------------------------------------------------------------------------------------------------|---|-------------|-------------|-------------|
| T <sub>1min</sub> ' | -679.74663123 | 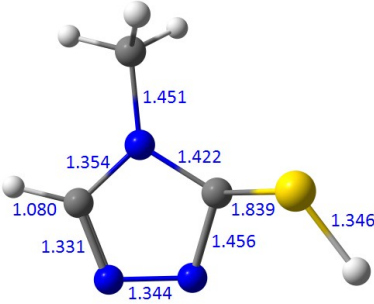 <p data-bbox="761 542 985 574">d(S-C-N-N): 113.5</p> | N | 1.19105300  | -1.59144900 | -0.25326500 |
|                     |               |                                                                                                                                         | N | 0.05887700  | -1.57368500 | 0.47143000  |
|                     |               |                                                                                                                                         | C | -0.32438400 | -0.17689500 | 0.61536800  |
|                     |               |                                                                                                                                         | N | 0.80087500  | 0.56694600  | 0.16631500  |
|                     |               |                                                                                                                                         | C | 1.61719200  | -0.34109100 | -0.41822800 |
|                     |               |                                                                                                                                         | S | -1.89391000 | 0.18844400  | -0.27146600 |
|                     |               |                                                                                                                                         | C | 0.89917900  | 2.01432200  | 0.13089600  |
|                     |               |                                                                                                                                         | H | 2.51826300  | -0.07092000 | -0.94827600 |
|                     |               |                                                                                                                                         | H | 0.67681200  | 2.41853400  | 1.11871600  |
|                     |               |                                                                                                                                         | H | 1.91215200  | 2.29455100  | -0.15213400 |
|                     |               |                                                                                                                                         | H | 0.19743800  | 2.43664900  | -0.59442300 |
|                     |               |                                                                                                                                         | H | -2.50965300 | -0.88462200 | 0.25999500  |

**Table S8.** Optimized Cartesian coordinates and Hartree-Fock energies (a.u.) at (TD-)B3LYP-(D3)BJ/6-311G(d, p) level with PCM  
(solvent=water)model.

| State             | H-F energy     | Structure                                                                                                    | Cartesian coordinates |             |             |             |
|-------------------|----------------|--------------------------------------------------------------------------------------------------------------|-----------------------|-------------|-------------|-------------|
| S <sub>0</sub>    | -679.8997099   | 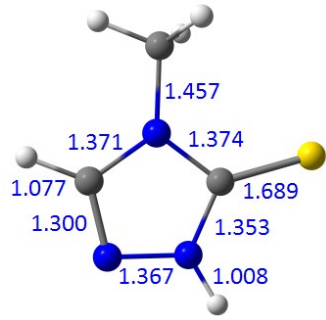 <p>d(S-C-N-N): 180.0</p>  | N                     | -1.77570100 | -1.15293300 | 0.00000600  |
|                   |                |                                                                                                              | N                     | -0.43805400 | -1.43632300 | 0.00001400  |
|                   |                |                                                                                                              | C                     | 0.35270900  | -0.33907600 | -0.00000300 |
|                   |                |                                                                                                              | N                     | -0.55457300 | 0.69299900  | -0.00002800 |
|                   |                |                                                                                                              | C                     | -1.81209900 | 0.14668700  | -0.00004600 |
|                   |                |                                                                                                              | H                     | -0.11743200 | -2.39244600 | 0.00004300  |
|                   |                |                                                                                                              | S                     | 2.03886400  | -0.24652000 | 0.00003100  |
|                   |                |                                                                                                              | C                     | -0.21140800 | 2.10869500  | -0.00001300 |
|                   |                |                                                                                                              | H                     | -2.71287500 | 0.73757800  | -0.00007000 |
|                   |                |                                                                                                              | H                     | 0.37286100  | 2.34515000  | -0.88871200 |
|                   |                |                                                                                                              | H                     | -1.13357600 | 2.68471300  | -0.00036100 |
|                   |                |                                                                                                              | H                     | 0.37228800  | 2.34530000  | 0.88902600  |
| S <sub>1min</sub> | -679.760175520 |  <p>d(S-C-N-N): 125.0</p> | N                     | 1.38050200  | -1.46161900 | -0.23543900 |
|                   |                |                                                                                                              | N                     | 0.13198200  | -1.44389500 | 0.32798400  |
|                   |                |                                                                                                              | C                     | -0.35130800 | -0.15967400 | 0.60718200  |
|                   |                |                                                                                                              | N                     | 0.70872800  | 0.62598800  | 0.10725500  |
|                   |                |                                                                                                              | C                     | 1.68839600  | -0.19746000 | -0.34749300 |
|                   |                |                                                                                                              | H                     | -0.30003200 | -2.31006400 | 0.60445000  |
|                   |                |                                                                                                              | S                     | -2.01259800 | 0.02987500  | -0.23878800 |
|                   |                |                                                                                                              | C                     | 0.70296300  | 2.07469300  | 0.11359100  |
|                   |                |                                                                                                              | H                     | 2.62059900  | 0.16111400  | -0.75382500 |

|                   |               |                                                                                                              |   |             |             |             |
|-------------------|---------------|--------------------------------------------------------------------------------------------------------------|---|-------------|-------------|-------------|
|                   |               |                                                                                                              | H | 0.70044300  | 2.45019700  | 1.13833500  |
|                   |               |                                                                                                              | H | 1.58550000  | 2.43943400  | -0.40753000 |
|                   |               |                                                                                                              | H | -0.19373500 | 2.43263600  | -0.39911400 |
| S <sub>2min</sub> | -679.75441601 | 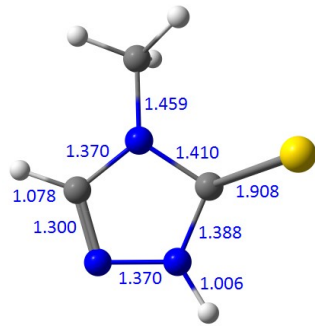 <p>d(S-C-N-N): 121.1</p>  | N | 1.67728900  | -1.19508300 | -0.21745100 |
|                   |               |                                                                                                              | N | 0.46127900  | -1.44338000 | 0.36285800  |
|                   |               |                                                                                                              | C | -0.30728300 | -0.30855300 | 0.57997800  |
|                   |               |                                                                                                              | N | 0.51997500  | 0.68644000  | 0.02001500  |
|                   |               |                                                                                                              | C | 1.67574400  | 0.08994700  | -0.41126500 |
|                   |               |                                                                                                              | H | 0.21818800  | -2.38600500 | 0.61638100  |
|                   |               |                                                                                                              | S | -2.02617700 | -0.21656900 | -0.24238500 |
|                   |               |                                                                                                              | C | 0.33554300  | 2.12252500  | 0.20296300  |
|                   |               |                                                                                                              | H | 2.48993800  | 0.63832100  | -0.85643100 |
|                   |               |                                                                                                              | H | 0.54412700  | 2.40151400  | 1.23853800  |
|                   |               |                                                                                                              | H | 1.01796600  | 2.64937700  | -0.46125700 |
|                   |               |                                                                                                              | H | -0.68522000 | 2.40254900  | -0.04707600 |
| T <sub>1min</sub> | -679.7846827  |  <p>d(S-C-N-N): 119.4</p> | N | 1.37501600  | -1.46054500 | -0.22842900 |
|                   |               |                                                                                                              | N | 0.17264900  | -1.47893400 | 0.40081100  |
|                   |               |                                                                                                              | C | -0.41812800 | -0.17036000 | 0.55003300  |
|                   |               |                                                                                                              | N | 0.68709100  | 0.63349500  | 0.07875300  |
|                   |               |                                                                                                              | C | 1.66150100  | -0.17886800 | -0.35349400 |
|                   |               |                                                                                                              | H | -0.37596800 | -2.32614800 | 0.35962800  |
|                   |               |                                                                                                              | S | -1.97810500 | 0.03527600  | -0.23686600 |
|                   |               |                                                                                                              | C | 0.70377700  | 2.08102800  | 0.13667200  |
|                   |               |                                                                                                              | H | 2.58729000  | 0.17907900  | -0.77643200 |
|                   |               |                                                                                                              | H | 0.72385300  | 2.41296100  | 1.17702400  |

|                                |                |                                                                                                              |   |             |             |             |
|--------------------------------|----------------|--------------------------------------------------------------------------------------------------------------|---|-------------|-------------|-------------|
|                                |                |                                                                                                              | H | 1.58417900  | 2.45072500  | -0.38477500 |
|                                |                |                                                                                                              | H | -0.19585300 | 2.47005600  | -0.34280200 |
| T <sub>2min</sub>              | -679.7831993   | 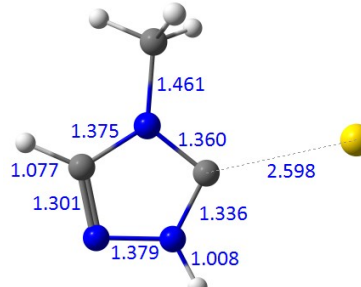 <p>d(S-C-N-N): 136.8</p>  | N | 2.00686300  | -1.08762700 | -0.23893400 |
|                                |                |                                                                                                              | N | 0.75729200  | -1.42222700 | 0.23835500  |
|                                |                |                                                                                                              | C | -0.05598000 | -0.38704500 | 0.46668300  |
|                                |                |                                                                                                              | N | 0.71943300  | 0.67233400  | 0.11077500  |
|                                |                |                                                                                                              | C | 1.94525800  | 0.21001300  | -0.30709500 |
|                                |                |                                                                                                              | H | 0.53905000  | -2.39530200 | 0.38706400  |
|                                |                |                                                                                                              | S | -2.57443500 | -0.25919600 | -0.15908300 |
|                                |                |                                                                                                              | C | 0.27840000  | 2.06481800  | 0.11720100  |
|                                |                |                                                                                                              | H | 2.74705400  | 0.84873900  | -0.63829400 |
|                                |                |                                                                                                              | H | -0.27532900 | 2.25917800  | 1.03293800  |
|                                |                |                                                                                                              | H | 1.15035900  | 2.71438800  | 0.07623500  |
|                                |                |                                                                                                              | H | -0.36134200 | 2.25605500  | -0.74471700 |
| S <sub>0</sub> /T <sub>1</sub> | -679.762029508 |  <p>d(S-C-N-N): 165.2</p> | N | -1.81047700 | -1.16991800 | -0.33511600 |
|                                |                |                                                                                                              | N | -0.54409900 | -1.42427300 | 0.10520800  |
|                                |                |                                                                                                              | C | 0.27225000  | -0.29626500 | -0.07559600 |
|                                |                |                                                                                                              | N | -0.59929700 | 0.74003200  | -0.30247600 |
|                                |                |                                                                                                              | C | -1.88790000 | 0.24134600  | 0.06183800  |
|                                |                |                                                                                                              | H | -0.16055400 | -2.35382100 | -0.01949500 |
|                                |                |                                                                                                              | S | 1.91901100  | -0.28413500 | -0.00321800 |
|                                |                |                                                                                                              | C | -0.23087100 | 2.14114400  | -0.15798400 |
|                                |                |                                                                                                              | H | -2.15793700 | 0.42297500  | 1.11396800  |
|                                |                |                                                                                                              | H | 0.74836700  | 2.29915800  | -0.60450700 |
|                                |                |                                                                                                              | H | -0.96927300 | 2.74642200  | -0.67997900 |

|                                |                |                                                                                                              |             |             |             |             |
|--------------------------------|----------------|--------------------------------------------------------------------------------------------------------------|-------------|-------------|-------------|-------------|
|                                |                |                                                                                                              | H           | -0.19821700 | 2.43115900  | 0.89724400  |
| S <sub>1</sub> /T <sub>1</sub> | -679.749000534 | 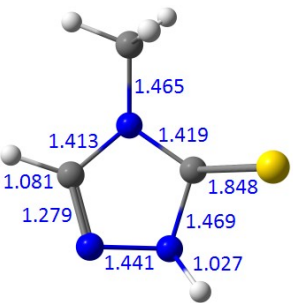 <p>d(S-C-N-N): 106.4</p>  | N           | 1.24433900  | -1.42038000 | -0.38624300 |
|                                |                |                                                                                                              | N           | 0.20955800  | -1.54758100 | 0.60796300  |
|                                |                |                                                                                                              | C           | -0.19472800 | -0.14225400 | 0.74992300  |
|                                |                |                                                                                                              | N           | 0.95527500  | 0.65689400  | 0.52349600  |
|                                |                |                                                                                                              | C           | 1.63028500  | -0.20139500 | -0.37312200 |
|                                |                |                                                                                                              | H           | -0.53938700 | -2.12316100 | 0.20394700  |
|                                |                |                                                                                                              | S           | -1.83377300 | 0.00821000  | -0.08935700 |
|                                |                |                                                                                                              | C           | 0.71772500  | 2.04699300  | 0.12757900  |
|                                |                |                                                                                                              | H           | 2.48027700  | 0.15925200  | -0.93601900 |
|                                |                |                                                                                                              | H           | 0.40891900  | 2.62876600  | 0.99566600  |
| H                              | 1.64580400     | 2.46616000                                                                                                   | -0.25868400 |             |             |             |
| H                              | -0.06285300    | 2.10972000                                                                                                   | -0.64854200 |             |             |             |
| T <sub>1</sub> -TS             | -679.7212113   |  <p>d(S-C-N-N): 117.3</p> | N           | 0.47180200  | -1.83570000 | -0.20310200 |
|                                |                |                                                                                                              | N           | -0.55828000 | -1.32446400 | 0.50678700  |
|                                |                |                                                                                                              | C           | -0.33892200 | 0.14794700  | 0.62965800  |
|                                |                |                                                                                                              | N           | 0.97958300  | 0.32405600  | 0.12130100  |
|                                |                |                                                                                                              | C           | 1.35744400  | -0.86862300 | -0.38742500 |
|                                |                |                                                                                                              | S           | -1.78865700 | 0.67672400  | -0.25145100 |
|                                |                |                                                                                                              | C           | 1.69223200  | 1.58662400  | 0.06672100  |
|                                |                |                                                                                                              | H           | 2.29721800  | -1.01094700 | -0.90093600 |
|                                |                |                                                                                                              | H           | 1.73057300  | 2.02773800  | 1.06377100  |
|                                |                |                                                                                                              | H           | 2.70509400  | 1.40794400  | -0.28916400 |
| H                              | 1.18925500     | 2.27918100                                                                                                   | -0.61251700 |             |             |             |
| H                              | -1.81987900    | -0.87442400                                                                                                  | -0.06656900 |             |             |             |

|            |              |                                                                                                             |                                                                                                                                                                                                                                                                                                                                                                                                                                                                                     |
|------------|--------------|-------------------------------------------------------------------------------------------------------------|-------------------------------------------------------------------------------------------------------------------------------------------------------------------------------------------------------------------------------------------------------------------------------------------------------------------------------------------------------------------------------------------------------------------------------------------------------------------------------------|
| $T_{1min}$ | -679.7469643 | 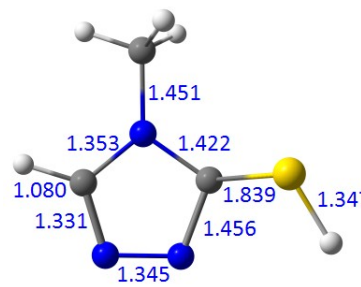 <p>d(S-C-N-N): 113.5</p> | N 1.19128700 -1.59143300 -0.25326800<br>N 0.05889900 -1.57377200 0.47161900<br>C -0.32453900 -0.17701800 0.61513600<br>N 0.80063800 0.56683800 0.16578500<br>C 1.61718800 -0.34090700 -0.41819800<br>S -1.89389300 0.18840400 -0.27159600<br>C 0.89934300 2.01433600 0.13123600<br>H 2.51840200 -0.07056900 -0.94790100<br>H 0.67794100 2.41787300 1.11952900<br>H 1.91212900 2.29428800 -0.15259100<br>H 0.19703900 2.43705200 -0.59322900<br>H -2.51094800 -0.88299700 0.26172800 |
|------------|--------------|-------------------------------------------------------------------------------------------------------------|-------------------------------------------------------------------------------------------------------------------------------------------------------------------------------------------------------------------------------------------------------------------------------------------------------------------------------------------------------------------------------------------------------------------------------------------------------------------------------------|



**Table S9.** Optimized Cartesian coordinates and Hartree-Fock energies (a.u.) at (TD-)B3LYP-(D3)BJ/6-311G(d, p) level in vacuum.

| State             | H-F energy     | Structure                                                                                                    | Cartesian coordinates |             |             |             |
|-------------------|----------------|--------------------------------------------------------------------------------------------------------------|-----------------------|-------------|-------------|-------------|
| S <sub>0</sub>    | -679.8850049   | 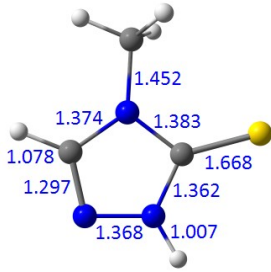 <p>d(S-C-N-N): 180.0</p>  | N                     | -1.79733600 | -1.12646000 | -0.00005100 |
|                   |                |                                                                                                              | N                     | -0.46296700 | -1.42952500 | 0.00000200  |
|                   |                |                                                                                                              | C                     | 0.35907600  | -0.34391000 | 0.00001700  |
|                   |                |                                                                                                              | N                     | -0.54516700 | 0.70313100  | -0.00003500 |
|                   |                |                                                                                                              | C                     | -1.81140700 | 0.17094600  | -0.00002200 |
|                   |                |                                                                                                              | H                     | -0.15326600 | -2.38725300 | 0.00001800  |
|                   |                |                                                                                                              | S                     | 2.02524100  | -0.27276100 | 0.00005900  |
|                   |                |                                                                                                              | C                     | -0.16477300 | 2.10468800  | -0.00003200 |
|                   |                |                                                                                                              | H                     | -2.70714200 | 0.77039800  | -0.00004500 |
|                   |                |                                                                                                              | H                     | 0.43367900  | 2.32467000  | -0.88477900 |
|                   |                |                                                                                                              | H                     | -1.06935000 | 2.71115300  | -0.00037000 |
|                   |                |                                                                                                              | H                     | 0.43313200  | 2.32484300  | 0.88504400  |
| S <sub>1min</sub> | -679.753590536 |  <p>d(S-C-N-N): 125.5</p> | N                     | 1.33693000  | -1.49133900 | -0.23963700 |
|                   |                |                                                                                                              | N                     | 0.08843500  | -1.42618000 | 0.32021900  |
|                   |                |                                                                                                              | C                     | -0.34161100 | -0.13750900 | 0.63284200  |
|                   |                |                                                                                                              | N                     | 0.73392300  | 0.61373700  | 0.12400700  |
|                   |                |                                                                                                              | C                     | 1.68459100  | -0.24008300 | -0.34291300 |
|                   |                |                                                                                                              | H                     | -0.36999600 | -2.27762600 | 0.59638600  |
|                   |                |                                                                                                              | S                     | -2.01053900 | 0.05960100  | -0.24047300 |
|                   |                |                                                                                                              | C                     | 0.74853300  | 2.05879600  | 0.09572600  |
|                   |                |                                                                                                              | H                     | 2.63022000  | 0.08692500  | -0.74555700 |
|                   |                |                                                                                                              | H                     | 0.71874000  | 2.45973300  | 1.11111500  |
|                   |                |                                                                                                              | H                     | 1.65259600  | 2.40205700  | -0.40537700 |

|                   |               |                                                                                                              |             |             |             |             |
|-------------------|---------------|--------------------------------------------------------------------------------------------------------------|-------------|-------------|-------------|-------------|
|                   |               |                                                                                                              | H           | -0.12702100 | 2.41454100  | -0.45505000 |
| T <sub>1min</sub> | -679.7745007  | 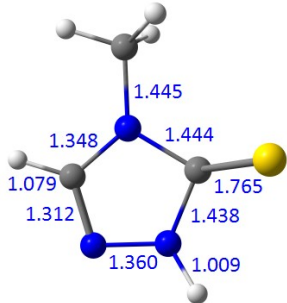 <p>d(S-C-N-N): 119.8</p>  | N           | 1.40462800  | -1.43841100 | -0.22591200 |
|                   |               |                                                                                                              | N           | 0.19564800  | -1.46986500 | 0.39520700  |
|                   |               |                                                                                                              | C           | -0.41228500 | -0.17601400 | 0.55483900  |
|                   |               |                                                                                                              | N           | 0.67834000  | 0.64370400  | 0.08230900  |
|                   |               |                                                                                                              | C           | 1.67044100  | -0.15945600 | -0.34946600 |
|                   |               |                                                                                                              | H           | -0.34392200 | -2.32096500 | 0.34866400  |
|                   |               |                                                                                                              | S           | -1.97897500 | 0.00550900  | -0.23669300 |
|                   |               |                                                                                                              | C           | 0.66075500  | 2.08760900  | 0.13190900  |
|                   |               |                                                                                                              | H           | 2.59168100  | 0.21046200  | -0.77279400 |
|                   |               |                                                                                                              | H           | 0.70333800  | 2.43329300  | 1.16848200  |
| H                 | 1.51371400    | 2.47999500                                                                                                   | -0.42111800 |             |             |             |
| H                 | -0.26499600   | 2.44822700                                                                                                   | -0.32106500 |             |             |             |
| T <sub>2min</sub> | -679.75777507 |  <p>d(S-C-N-N): 117.7</p> | N           | 1.97853500  | -1.06722400 | -0.37662900 |
|                   |               |                                                                                                              | N           | 0.86276900  | -1.39493200 | 0.36648900  |
|                   |               |                                                                                                              | C           | 0.06946600  | -0.37158000 | 0.71347000  |
|                   |               |                                                                                                              | N           | 0.73372800  | 0.68005100  | 0.15077900  |
|                   |               |                                                                                                              | C           | 1.86237200  | 0.22022800  | -0.49327400 |
|                   |               |                                                                                                              | H           | 0.70725000  | -2.36316800 | 0.59252100  |
|                   |               |                                                                                                              | S           | -2.61700700 | -0.29041600 | -0.22068200 |
|                   |               |                                                                                                              | C           | 0.26203700  | 2.05735300  | 0.17835200  |
|                   |               |                                                                                                              | H           | 2.56129600  | 0.85120800  | -1.01755900 |
|                   |               |                                                                                                              | H           | 1.08337900  | 2.73182400  | 0.42377600  |
| H                 | -0.16248900   | 2.33543300                                                                                                   | -0.78822200 |             |             |             |

|                                |                |                                                                                                             |             |             |             |             |
|--------------------------------|----------------|-------------------------------------------------------------------------------------------------------------|-------------|-------------|-------------|-------------|
|                                |                |                                                                                                             | H           | -0.50580700 | 2.13009900  | 0.94463800  |
| S <sub>0</sub> /T <sub>1</sub> | -679.755321997 | 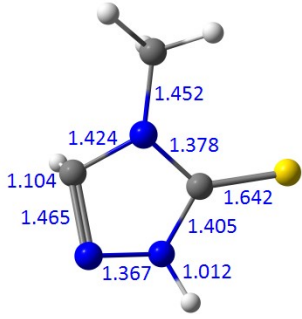 <p>d(S-C-N-N): 164.3</p> | N           | -1.82574000 | -1.14201500 | 0.31946900  |
|                                |                |                                                                                                             | N           | -0.55800200 | -1.41645900 | -0.11094200 |
|                                |                |                                                                                                             | C           | 0.28083900  | -0.30640300 | 0.08106900  |
|                                |                |                                                                                                             | N           | -0.58487300 | 0.74606100  | 0.28654200  |
|                                |                |                                                                                                             | C           | -1.87931000 | 0.27029600  | -0.06709600 |
|                                |                |                                                                                                             | H           | -0.18946300 | -2.34759000 | 0.03720600  |
|                                |                |                                                                                                             | S           | 1.92233600  | -0.32208600 | 0.04413400  |
|                                |                |                                                                                                             | C           | -0.19050700 | 2.13689100  | 0.15230200  |
|                                |                |                                                                                                             | H           | -2.16488000 | 0.46917300  | -1.11471400 |
|                                |                |                                                                                                             | H           | -0.19480800 | 2.44919800  | -0.89870000 |
| H                              | -0.88921400    | 2.75290100                                                                                                  | 0.71645600  |             |             |             |
| H                              | 0.81334200     | 2.25995500                                                                                                  | 0.55408000  |             |             |             |
| S <sub>1</sub> /T <sub>1</sub> | -679.71160035  |  <p>d(S-C-N-N): 93.2</p> | N           | 1.18414600  | -1.40464400 | -0.35945700 |
|                                |                |                                                                                                             | N           | 0.26389400  | -1.61959400 | 0.66390100  |
|                                |                |                                                                                                             | C           | -0.20446600 | -0.16708900 | 0.73152000  |
|                                |                |                                                                                                             | N           | 1.03052200  | 0.66458300  | 0.59294000  |
|                                |                |                                                                                                             | C           | 1.60582800  | -0.17677400 | -0.34567200 |
|                                |                |                                                                                                             | H           | -0.50439300 | -2.15949400 | 0.23531900  |
|                                |                |                                                                                                             | S           | -1.68596600 | 0.23891900  | -0.29401200 |
|                                |                |                                                                                                             | C           | 0.71449800  | 2.02380400  | 0.15511600  |
|                                |                |                                                                                                             | H           | 2.41353100  | 0.14864800  | -0.98659800 |
|                                |                |                                                                                                             | H           | 0.44847100  | 2.64270400  | 1.01116900  |
| H                              | 1.57006000     | 2.45946900                                                                                                  | -0.36296800 |             |             |             |

|                     |              |                                                                                                              |   |             |             |             |
|---------------------|--------------|--------------------------------------------------------------------------------------------------------------|---|-------------|-------------|-------------|
|                     |              |                                                                                                              | H | -0.17468300 | 1.99069200  | -0.52465200 |
| T <sub>1</sub> -TS  | -679.7116299 | 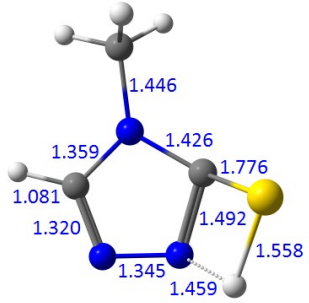 <p>d(S-C-N-N): 117.1</p>  | N | 0.46930800  | -1.83291600 | -0.20680300 |
|                     |              |                                                                                                              | N | -0.55610000 | -1.32300500 | 0.49885600  |
|                     |              |                                                                                                              | C | -0.33895100 | 0.14651500  | 0.63728600  |
|                     |              |                                                                                                              | N | 0.98605000  | 0.32381700  | 0.14157700  |
|                     |              |                                                                                                              | C | 1.35736300  | -0.87328500 | -0.38464600 |
|                     |              |                                                                                                              | S | -1.78251100 | 0.67427400  | -0.25301000 |
|                     |              |                                                                                                              | C | 1.67825100  | 1.59009000  | 0.05675700  |
|                     |              |                                                                                                              | H | 2.29363100  | -1.01880100 | -0.90438200 |
|                     |              |                                                                                                              | H | 1.64521700  | 2.08945600  | 1.02702200  |
|                     |              |                                                                                                              | H | 2.71861000  | 1.41536600  | -0.21818600 |
|                     |              |                                                                                                              | H | 1.21553500  | 2.24152100  | -0.69140800 |
|                     |              |                                                                                                              | H | -1.82760300 | -0.87112200 | -0.05667500 |
| T <sub>1min</sub> ' | -679.7343833 |  <p>d(S-C-N-N): 113.7</p> | N | 1.18589500  | -1.58832700 | -0.25500000 |
|                     |              |                                                                                                              | N | 0.06018000  | -1.57120200 | 0.46110200  |
|                     |              |                                                                                                              | C | -0.31927800 | -0.17373800 | 0.62439100  |
|                     |              |                                                                                                              | N | 0.81030900  | 0.57286400  | 0.19265600  |
|                     |              |                                                                                                              | C | 1.61882700  | -0.34181500 | -0.41684000 |
|                     |              |                                                                                                              | S | -1.89185200 | 0.18533400  | -0.26656900 |
|                     |              |                                                                                                              | C | 0.88259600  | 2.01494400  | 0.11494100  |
|                     |              |                                                                                                              | H | 2.51590100  | -0.07610500 | -0.95619900 |
|                     |              |                                                                                                              | H | 0.57929000  | 2.44644800  | 1.06989600  |
|                     |              |                                                                                                              | H | 1.90932300  | 2.31396300  | -0.09672800 |
|                     |              |                                                                                                              | H | 0.22999600  | 2.40932900  | -0.67285600 |

|  |  |  |   |             |             |            |
|--|--|--|---|-------------|-------------|------------|
|  |  |  | H | -2.45244500 | -0.94867400 | 0.19473400 |
|--|--|--|---|-------------|-------------|------------|
